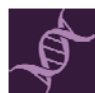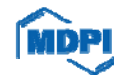

1 Article

## 2 Automated microscopic measurement of fibrinoid microclots 3 and their degradation by nattokinase, the main natto protease

4 Justine M. Gixti<sup>1</sup>, Chrispian W. Theron<sup>1,2</sup>, J. Enrique Salcedo-Sora<sup>1,2</sup>, Ethersia Pretorius<sup>1,3\*</sup> & Douglas B. Kell<sup>1,2,3,4\*</sup>

5 <sup>1</sup> Department of Biochemistry, Cell and Systems Biology, Institute of Systems, Molecular and Integrative Bi-  
6 ology, Faculty of Health and Life Sciences, University of Liverpool, L69 7ZB, UK.

7 [\[justine.gixti@c.theron|j.salcedo-sora|dbk@liverpool.ac.uk\]](mailto:justine.gixti@liverpool.ac.uk)

8 <sup>2</sup> Gene Mill Biofoundry, Institute of Systems, Molecular and Integrative Biology, Faculty of Health and Life  
9 Sciences, University of Liverpool, L69 7ZB, UK.

10 <sup>3</sup> Department of Physiological Sciences, Faculty of Science, Stellenbosch University, Stellenbosch, Private Bag  
11 X1 Matieland, 7602, South Africa; [resiap@sun.ac.za](mailto:resiap@sun.ac.za) ORCID: 0000-0002-9108-2384

12 <sup>4</sup> The Novo Nordisk Foundation Centre for Biosustainability, Technical University of Denmark, Søtofts Plads  
13 220, 2800 Kgs Lyngby, Denmark. ORCID: 0000-0001-5838-7963

14 \* Correspondence: [dbk@liv.ac.uk](mailto:dbk@liv.ac.uk); [resiap@sun.ac.za](mailto:resiap@sun.ac.za)

15  
16 **Abstract:** Nattokinase, from the Japanese fermented food natto, is a protease with fibrinolytic ac-  
17 tivity that can thus degrade conventional blood clots. In some cases, however, including in Long  
18 COVID, fibrinogen can polymerise into an anomalous amyloid form to create clots that are re-  
19 sistant to normal fibrinolysis and that we refer to as fibrinoid microclots. These can be detected  
20 with the fluorogenic stain thioflavin T. We describe an automated microscopic technique for the  
21 quantification of fibrinoid microclot formation, which also allows the kinetics of their formation  
22 and aggregation to be recorded. We also here show that recombinant nattokinase is effective at  
23 degrading the fibrinoid microclots *in vitro*. This adds to the otherwise largely anecdotal evidence,  
24 that we review, that nattokinase might be anticipated to have value as part of therapeutic treat-  
25 ments for individuals with Long COVID and related disorders that involve fibrinoid microclots.

26 **Keywords:** Microclots – fibrinoid – chronic disease – fibrinolysis – nattokinase – Long COVID

### 28 1. Introduction

29 **Citation:** To be added by editorial  
30 staff during production.

31 Academic Editor: Firstname  
32 Lastname

33 Received: date

34 Revised: date

35 Accepted: date

36 Published: date

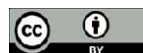

37 **Copyright:** © 2024 by the authors,  
38 Submitted for possible open access

publication under the terms and

conditions of the Creative Commons

Attribution (CC BY) license

(<https://creativecommons.org/licenses/by/4.0/>)

40

41

29 Thrombosis, the blocking of blood vessels by blood clots, along with the related  
30 thrombo-inflammation and thromboembolism, is a chief cause of cardiovascular disease  
31 [1-6]. Consequently anything that can promote safe anti-coagulation or fibrinolytic ac-  
32 tivity is likely to have therapeutic potential (e.g. [7-15]).

33 Nattō (usually rendered natto) is a Japanese food made via the fermentation of soy  
34 beans using the Gram-positive organism *Bacillus subtilis* var natto [16-20]. It has been  
35 widely consumed for over 2000 years, and is considered safe [21]. The proteolytic activ-  
36 ity of natto was detected in 1906 [22] and its fibrinolytic activity in 1925 [23]. However, it  
37 was not until 1987 [21] that an enzyme exhibiting these activities was purified from  
natto; in spite of it being a protease it was termed nattokinase [21].

Despite having to pass through the gut wall [24-31], nattokinase is orally available (and  
this can be improved [32-34]), is considered a major contributor to the purported health  
benefits of natto [21,27,35-60], and is itself recognised as safe [61-63].

42

43 The experimental 3D structure of nattokinase, which is a serine protease related to subtilisin, is available [64,65], and it  
44 may also be produced via purification [66-69] or (as here) recombinantly [44,70-83]. Although not our prime focus in  
45 this paper, it is also known to cleave plasminogen activator inhibitor I [84], to have antiplatelet [85], anti-inflammatory  
46 [86], and anti-hypertensive [87-89] activities, and to show neuroprotective [90] and post-stroke benefits [91] as well,  
47 when dosed adequately, as having anti-lipidaemic effects [92].

48

49 Following earlier work using electron microscopy (e.g. [93-96]), we discovered that fibrinogen could polymerise or  
50 clot into an anomalous, amyloid form of fibrin (e.g. [97-104]) that exactly reflected the clots seen in both the electron  
51 microscope [105] and in bright field optical microscopy [106]. As with prions and other amyloid forms of proteins  
52 [98,107], that are often highly resistant to proteolysis (e.g. [108,109]), the existence of these 'fibrinoid' microclots im-  
53 plies their comparative resistance to normal fibrinolysis [110,111], with their precise structures [112] being affected by  
54 other small and macromolecules and ions that they may have bound [97,103,113-119]. The varieties of stable  
55 macrostates into which a given amyloidogenic sequence can fold (even under the same conditions [120,121]) are re-  
56 ferred to as different 'strains' [122-132] or 'polymorphisms' [133-144], and in some cases are sufficiently stable (i.e. ki-  
57 netically isolated from other macrostates) that they are even heritable [122,145-151]. Homo- and hetero-polymerisation  
58 and their catalysis are then referred to, respectively, as (self-) 'seeding' [140,152-166] and 'cross-seeding' [153,167-174].  
59 More recently, we have established the prevalence of these fibrinoid microclots in post-viral diseases such as Long  
60 COVID [106,175-178] (and see [179]) and ME/CFS (myalgic encephalopathy/chronic fatigue syndrome) [180,181]. The  
61 lower amyloidogenicity of omicron versus earlier variants of SARS-CoV-2 is also reflected in its lower virulence [182],  
62 implying that these microclots are on the aetiological pathway of the disease, and they can explain many symptoms  
63 [183], including fatigue [184], post-exertional symptom exacerbation [185], autoantibody generation [107] and Postural  
64 Orthostatic Tachycardia Syndrome (POTS) [186]. Fibrin amyloid microclots also occur during sepsis [187], while amy-  
65 loid deposits are also observed in the skeletal muscles of those with Long COVID [188]. Overall, this ability of  
66 fibrinoid microclots to provide a mechanistic explanation of multiple phenomena is consistent with the 'explanatory  
67 coherence' view of science [189-192]. In common with other amyloid proteins [98], that contain a characteristic cross- $\beta$   
68 motif [173,193-209], they can be visualized using the fluorogenic stain thioflavin T [144,173,210-224] or via vibrational  
69 spectroscopy [221,225-236]. As with any other ligand or binding agent, the rotation of the bound form is more re-  
70 stricted than that of the free form (which is largely what makes it fluorogenic), and precise intensities of thioflavin T  
71 fluorescence depend on the location and conformation(s) to which the thioflavin T is bound [212-214,237-254] and in  
72 some cases on the presence of interferents [255].

73

74 Although nattokinase preparations are widely available commercially, and as noted above they are considered to  
75 have significant therapeutic value, including in Long COVID [256,257], their exact contents are uncertain, and so we  
76 decided that it was best to create and use purified, recombinant material.

77

78 While the proteolytic specificity of nattokinase, as an alkaline serine protease [44,258,259], is surprisingly underex-  
79 plored, beyond a broad similarity to that of plasmin [44,260] (and nattokinase can even degrade spike protein [261]  
80 and certain 'classical' amyloids [262-264]), the question arises as to whether or not nattokinase can degrade the amy-  
81 loid 'fibrinoid' form of microclots. The purposes of this paper are (i) to describe an efficient, quantitative, automated  
82 microscopic method that can be used to determine the size and number of amyloid microclots and any  
83 time-dependent changes therein, and thus (ii) to assess any such nattokinase-induced degradation of the microclots,

84 concluding that nattokinase can indeed degrade fibrinoid microclots effectively. The therapeutic implications of this  
85 are discussed.

## 86 2. Results

### 87 Basic phenomenon, and effect of concentration of NK and incubation time

88 To give an indication of the kinds of data obtained in this study, Figure 1 (left panels) shows three Cytation images  
89 representing clots as stained with thioflavin T following incubation of fibrinogen plus thrombin plus LPS ( as in [97])  
90 for 6h, either with no further additions (Figure 1A, top), with PBS (Figure 1B, middle), or after simultaneous exposure

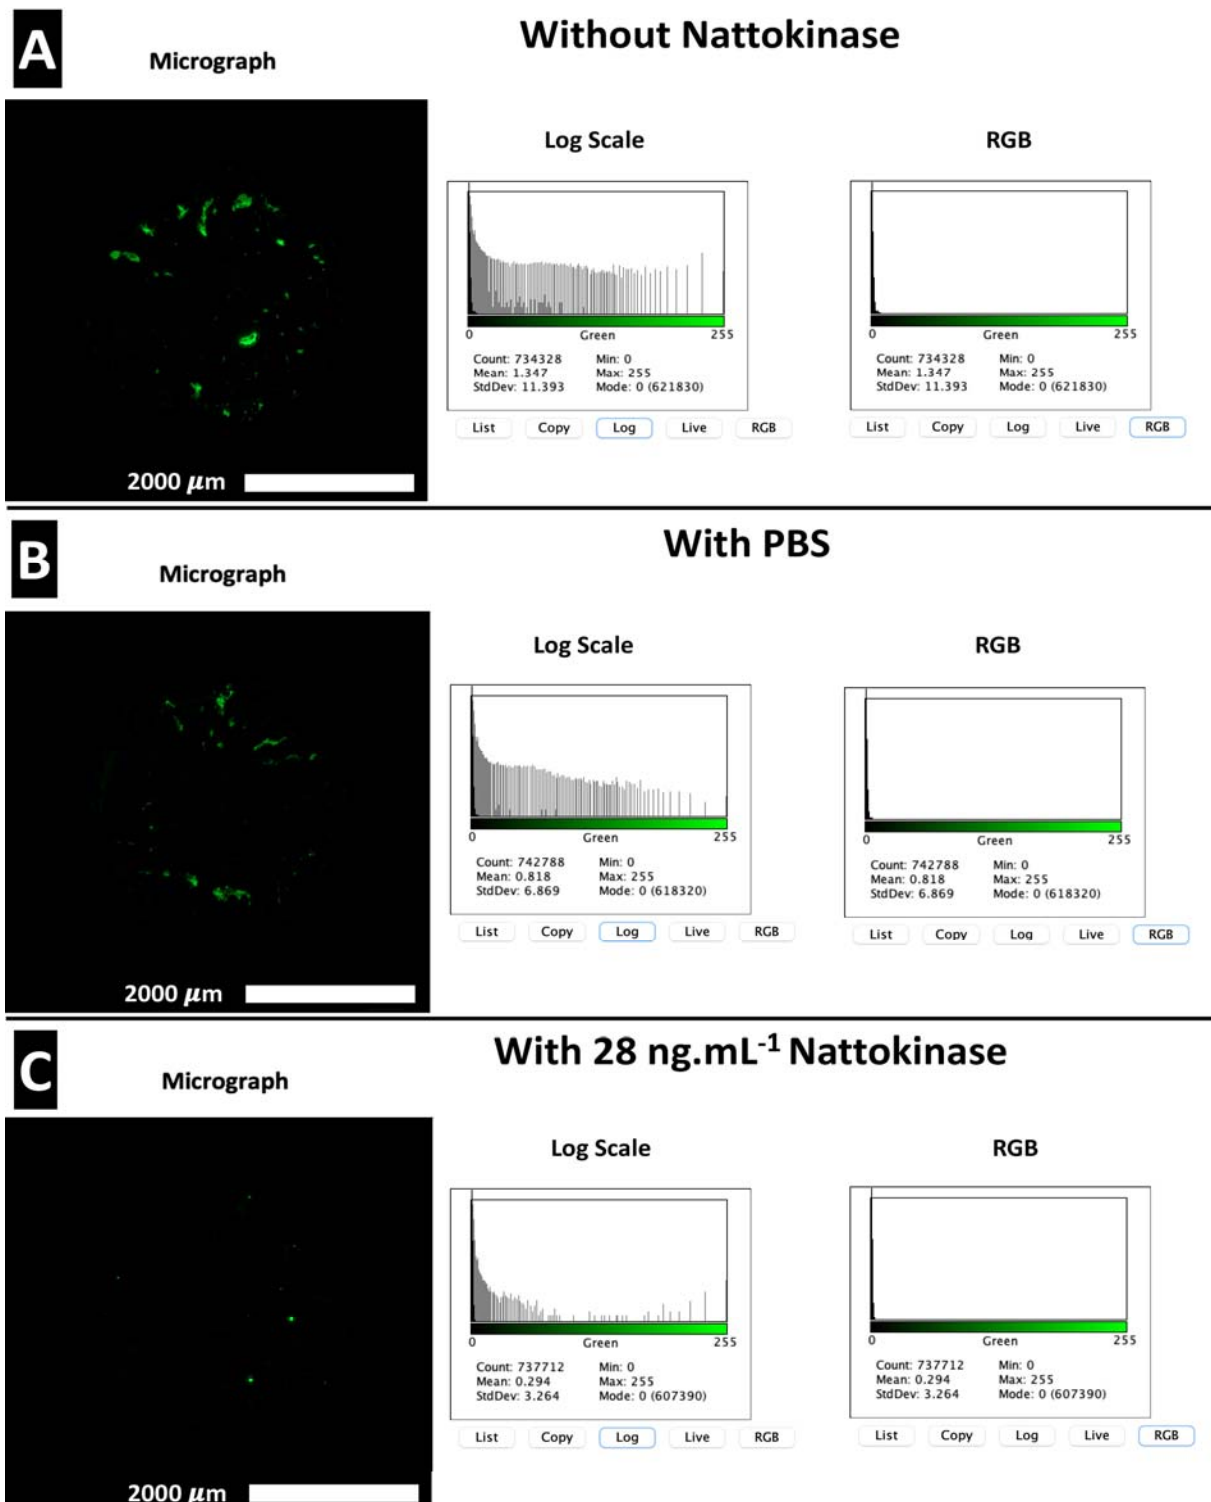

91 to 28 ng/mL nattokinase

92 **Figure 1.** Images of fibrinoid microclot formation and their removal via nattokinase. Thrombin and fibrinogen were  
93 incubated together with thioflavin T and LPS, and imaged after 6h in a Cytation 1, as described in Methods. Further  
94 additions were (A) none, (B) PBS, (C) recombinant nattokinase 28 ng/mL. Bar = 2 mm (2,000  $\mu$ m).

95

96 in PBS (Figure 1C, bottom). In addition, the right hand panels of the figure show the 8-bit intensity distributions of  
97 pixels on linear and logarithmic scales.

98

99 While we sought to avoid any 'cherry picking' in the past, the great attraction of the present approach is that the en-  
100 tire sample is imaged (serially) so this issue is completely avoided. Although not necessarily obvious to the naked eye,  
101 there are variations in pixel intensity that allow a thresholding to determine what counts as a clot boundary. Figure 1  
102 also shows the pixel intensity variation for the images displayed on its left side; the logarithmic plot in particular  
103 makes clear how much the pixels of larger intensity differed following the addition of the nattokinase.

104

105 The time evolution of these data (Figure 2) shows that in the absence of nattokinase the clot numbers increase for an  
106 hour or so then decrease slightly before stabilizing (Figure 2A). When nattokinase is present the clot numbers decrease  
107 after the first time point and by 2h have attained their lowest level, this being approximately half that of the 14 ng/mL  
108 nattokinase (in which the nattokinase level is thus halved), possibly implying a loss of activity over time. In Figure 2B  
109 we see the dynamics of the clot intensity (total number of pixels), this being substantially lower in the presence of NK,  
110 especially at the higher level of enzyme. Figure 2C shows the time evolution of the median clot size.

111

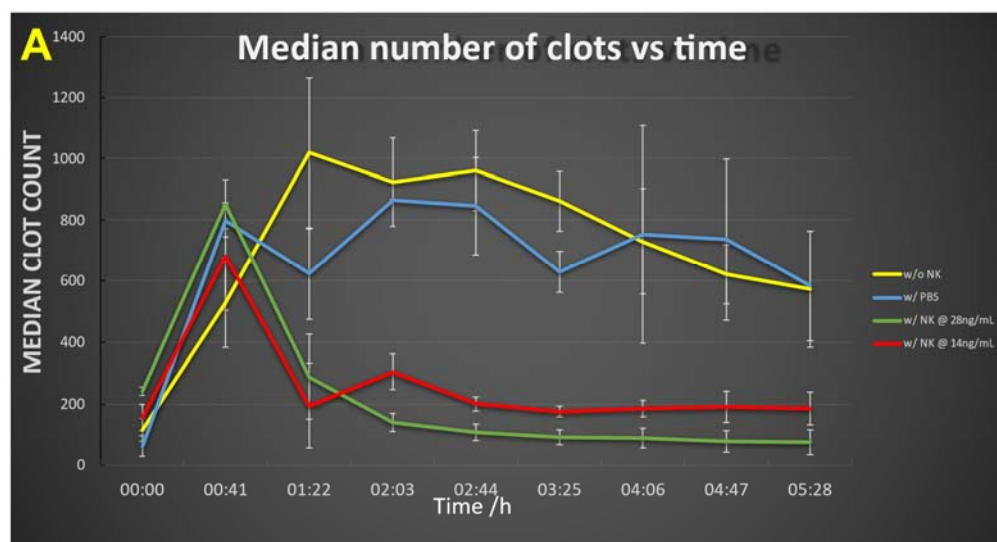

112

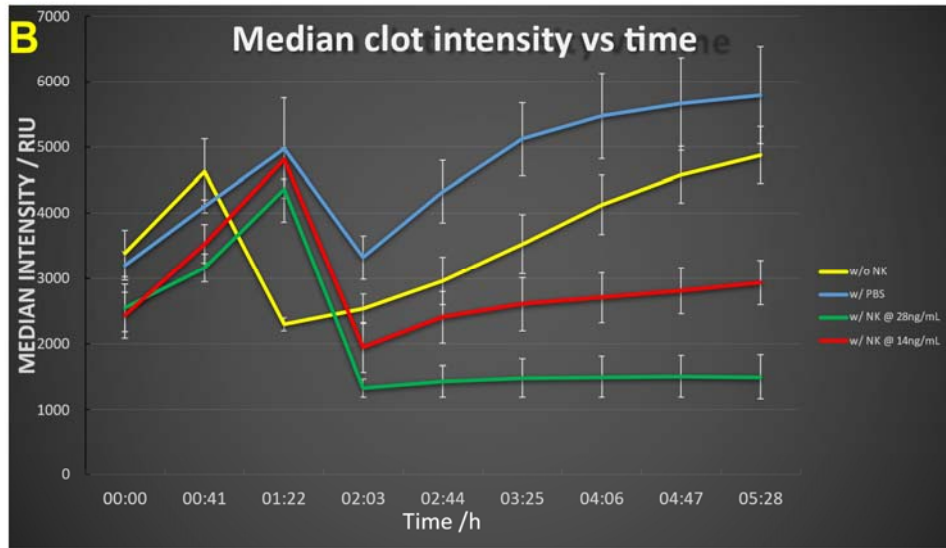

113

114 00

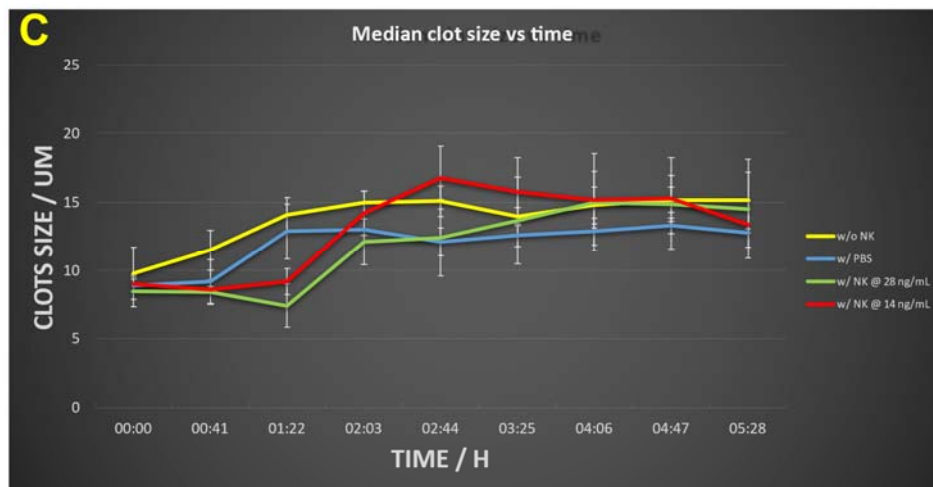

115

116 **Figure 2.** Time evolution of (A) clot number, (B) intensity and (C) median clot size during the development of  
117 fibrinoid microclots and their incubation with nattokinase. Thrombin and fibrinogen were incubated together with  
118 thioflavin T, and imaged after 6h in a Cytation 1, as described in Methods. Further additions were none (yellow), PBS

119 (blue), recombinant nattokinase 28 ng/mL (green), or recombinant nattokinase 14 ng/mL (red). Videos of the incuba-  
120 tion with PBS and with nattokinase are given in Supplementary Information.

121

122 Three features stand out. First, especially in the absence of NK (yellow trace), the clots increase in number and size  
123 over time (Figure 2A, 2B), illustrating how microclots may aggregate to form macroclots, as part of the normal  
124 amyloidogenic process (e.g. [173,212,215,239,265-275]). This kind of aggregation may be highly significant in stroke  
125 and myocardial infarctions, where clots may be far larger than the simple sloughing off of atherosclerotic plaques  
126 might reasonably create. Secondly, the enzyme effectively decreases the rate and extent of microclot formation, in  
127 rough proportion to the amount of enzyme (compare e.g. red and green traces at 5h). The lowest intensity point was  
128 observed in the interval 2-4h, implying a die-off in activity or instability of the enzyme over time. This is good, in that  
129 untrammelled fibrinolytic activity may not be of the greatest therapeutic benefit. Lastly, the median clot size (Fig 2C)  
130 increases briefly then stabilizes. This reflects the fact that smaller clots will tend to be degraded preferentially as their  
131 surface area per unit mass is significantly greater than that of larger clots. (It is not commonly recognised, but if one  
132 imagines two solid spheres, of which one is twice the diameter of the other, the degradation of a given (i.e. the same)  
133 mass in the two spheres leads to a loss in mass of just 12.5% of the larger sphere when the smaller one is completely  
134 degraded, and a loss in radius of the larger sphere that is less than 5% of its starting value. Consequently, although  
135 possibly at first glance surprising, this is, given the traces in Figures 2A and 2B, in fact the result expected for Figure  
136 2C.)

137

### 138 **Using Amytracker dyes instead of ThT**

139 Because it is valuable to have other dyes should one wish to use multiple wavelengths (as in [103]), we also assessed  
140 the red oligothiophene-class Amytracker™ dyes (Ebba Biotech) (see e.g. [101,103,105,276-283]). However, these gave  
141 highly anomalous traces in this system, and we suspect may have inhibited the nattokinase, so were not further pur-  
142 sued.

143

## 144 **3. Discussion**

145 The ability to assess the rate of fibrin amyloid formation and degradation noninvasively is highly desirable, as it pre-  
146 cisely permits studies of the present type that can then be automated. While still not a high-throughput approach in  
147 the usual sense, this does provide a substantial advance in scoring fibrin amyloid microclot formation that is both fully  
148 quantitative and without undue operator fatigue. This has allowed us, for the first time, to conclude at least three im-  
149 portant features: (i) the formation kinetics of fibrin amyloid microclots in whole samples may be imaged noninva-  
150 sively in an automated manner, (ii) such microclots can aggregate over time, and (iii) the fibrin amyloid microclots may  
151 be degraded by nattokinase. This latter has significant therapeutic implications for those suffering from Long COVID  
152 and related disorders, as NK preparations are widely available commercially. Our approach also thus allows for the  
153 comparison of different preparations of NK. Future work could usefully include recombinant serrapeptase (NK/SP),  
154 lumbrokinase (NK/LK) and/or sequence variants of NK/SP made using the methods of synthetic biology [284], since  
155 both serrapeptase and lumbrokinase also have fibrinolytic and amyloid-degrading properties [60,285-296].

## 156 **4. Materials and Methods**

### 157 **Assay method**

158 *In vitro* microclots were made by mixing commercially obtained fibrinogen (Sigma catalogue number 9001-32-5, at a  
159 final concentration of 2 mg/mL) and thrombin (Sigma, final amount 14U) with bacterial LPS (Sigma product code  
160 L2630-10MG) and used at a final concentration of 1ng / mL and incubated at 37°C for 30 min. Samples were then ex-  
161 posed to the fluorogenic amyloid dye, Thioflavin T (ThT) (final concentration: 0.03 mM) for 20 mins (protected from  
162 light) at room temperature. Following incubation, 10 µL of the recombinantly produced nattokinase at different con-  
163 centrations / PBS (control) were added. This was then followed by immediately pipetting 15 µL of assay sample onto a  
164 15-well slide 'angiogenesis' glass bottom plate used without a lid (Ibidi:  
165 <https://ibidi.com/chambered-coverslips/245--slide-15-well-3d-glass-bottom.html>), reproduced in Figure 3, and without  
166 shaking (cf. [142,297-309]). The excitation wavelength band for ThT was set at 450 nm to 499 nm and the emission at  
167 499 nm to 529 nm. Samples were viewed using Gen5 software on an Agilent BioTek Cytation 1 Cell Imaging Multi-  
168 mode Reader, essentially following the protocol developed and described by Dalton and colleagues [179]. The  
169 Cytation instrument is an automated fluorescence microscope with 8-bit intensity resolution in which an entire, large  
170 field of view can be constructed at high magnification by taking serial images and moving the stage automatically.  
171 With the 4x objective used, each final image (as in Figure 1) was composed of 1296 individual images. The typical file  
172 size of a final, stitched .tif image was 19 Mb. Each experiment was run multiple times, each time being in triplicate  
173 (three separate wells). Other relevant settings that we optimized for this assay were as follows: the Cytation 1 temper-  
174 ature was set at 37C, and images were taken every 41 minutes for 6 hours. The colour channel used was GFP 469,525  
175 A fixed focal height setting, with a bottom elevation of 549 µm and 0 µm offset was selected. A Z-Stack montage of the  
176 entire well was applied, with a step size of 86.9 µm, and 12 slices. Samples were analysed using the Gen5 Image Prime  
177 3.13.15 software supplied with the instrument, and the thresholds for minimum and maximum object (clots) size that  
178 could be detected were set at 5 and 500 µm, respectively.  
179

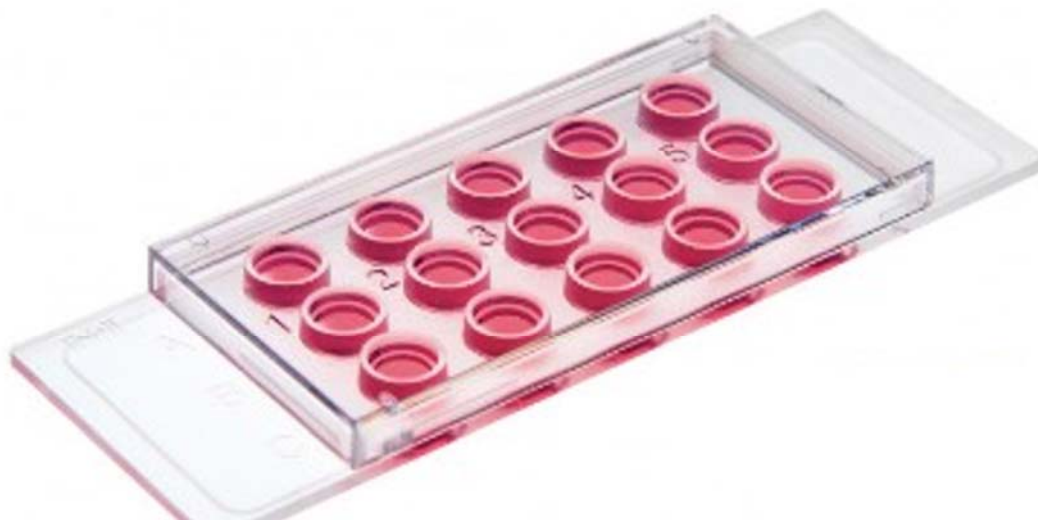

### Ibidi 15-well 3D glass-bottomed microslide as used herein

180

181 **Figure 3.** The incubation system used herein, allowing imaging from below



## 182 Recombinant nattokinase

183 Recombinant nattokinase was produced within the Liverpool Gene Mill. The nucleotide sequence for *Bacillus subtilis*  
184 nattokinase (Uniprot [Q93L66](https://www.uniprot.org/uniprot/Q93L66), GenBank: AER52006.1) was synthesised by Twist Bioscience and supplied in the  
185 pET28a(+) plasmid. The sequence was modified to include a C-terminal poly-Histidine tag for purification, as well as  
186 an N-terminal PelB leader sequence in which the terminal QPAMA residues are replaced by APOIA, and with a  
187 penta-aspartate linker for targeting to the periplasmic space [310] plus a ENLYFQ TEV cleavage site and a further SGS  
188 linker prior to the nattokinase sequence (beginning AQSVPY). The vector was used to transform chemically compe-  
189 tent cells of the Rosetta™ strain of *Escherichia coli* (Novagen) according to the method described by Inoue *et al* [311].  
190 Transformed cells were plated on plates of LB-agar (0.5% w/v yeast extract, 1% w/v NaCl, 1% w/v tryptone and 2%  
191 agar) supplemented with 50 µg/ml kanamycin and 25 µg/ml chloramphenicol. A single colony from the agar plate  
192 was used to inoculate 5 ml of LB broth (0.5% w/v yeast extract, 1% w/v NaCl, 1% w/v tryptone) supplemented with  
193 kanamycin and chloramphenicol as described above, for overnight culturing at 37°C with shaking. The culture was  
194 diluted to an OD<sub>600</sub> of 0.05 in 500 ml of LB broth supplemented with kanamycin and chloramphenicol as described  
195 above, and incubated with shaking at 37°C. When an OD<sub>600</sub> of 0.6 was reached, recombinant protein expression was  
196 induced by addition of 0.75 mM isopropyl β-D-1-thiogalactopyranoside (IPTG), and the culture was incubated over-  
197 night at 18°C with shaking. Cell pellets were harvested by centrifugation at 4000 xg for 10 minutes, and the pellets  
198 were resuspended in 50 ml of a solution of Tris-HCl (pH8) and 10 mM EDTA, and incubated at 60°C for 2 hours [312].  
199 The suspension was centrifuged at 4°C at 16000 xg for 10 minutes, and the supernatant was passed through 1 ml of  
200 HisPur™ Ni-NTA resin (Thermo Scientific) to purify poly-Histidine-tagged proteins. Bound proteins were eluted us-  
201 ing 500 mM imidazole, followed by desalting and concentration using a Pierce™ Protein Concentrator PES (Thermo  
202 Scientific) with 30 kDa cut-off. Protein yield was quantified using the Pierce™ Bradford Protein Assay Kit (Thermo  
203 Scientific), and samples were frozen with 10% v/v glycerol until further use. Inclusion body formation [313] was not  
204 here a significant issue. Figure 4 shows a gel illustrating the final preparation.

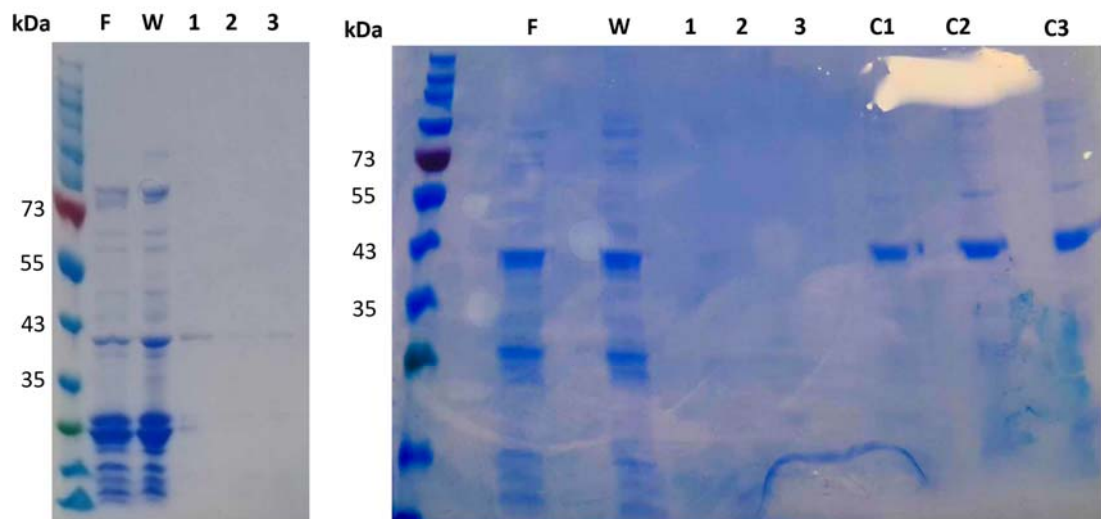

**Figure 4: SDS-PAGE of recombinant Nattokinase.** F – sample flow-through (unbound proteins); W – fraction of wash buffer (100 mM Tris, pH 7.5, 150 mM NaCl, 50 mM imidazole); 1-3 – purified fractions using elution buffer (100 mM Tris, pH 7.5, 150 mM NaCl, 500 mM imidazole); C1&C2 - purified samples concentrated through 30 kD cut-off protein concentrator unit; C3 - C1 & C2 samples pooled and further concentrated through 3 kD cut-off protein concentrator unit.



206

207 A kinetic experiment was set up on the Cytation 1 and the effect of nattokinase on microclots was studied at final  
208 concentrations of 28 ng/ $\mu$ L and 14 ng/ $\mu$ L, using ThT at a final concentration of 0.005mM, as the fluorogenic dye.  
209 Measurements were taken every 40 minutes.

210

211 **Supplementary figures.** Movies (not submitted in preprint) showing a kinetic series of images for samples treated  
212 with either PBS (Supplementary Figure 1) or 28 ng/mL nattokinase (Supplementary Figure 2). Frames start from read 1  
213 at time zero and end at read 9 at time 5h 28m. Movies play at 0.5 frames per second. Time zero is the start of the reac-  
214 tion when PBS / NK was added to the sample containing fibrinogen, LPS, Thrombin, and ThT as described in the  
215 text. Green annuli are an artefact that may be ignored.

216

217

218 **Author Contributions:** Conceptualization, DBK & EP; methodology, JMG, JES-S, CWT; resources, DBK & EP.; writing—original  
219 draft preparation, DBK; writing—review and editing, All authors; project administration, DBK & EP; funding acquisition DBK & EP.  
220 All authors have read and agreed to the published version of the manuscript.

221

222 **Funding:** EP: Funding was provided by NRF of South Africa (grant number 142142) and SA MRC (self-initiated re-  
223 search (SIR) grant), and Balvi Foundation. DBK thanks the Balvi Foundation (grant 18) and the Novo Nordisk Foun-  
224 dation for funding (grant NNF20CC0035580). The content and findings reported and illustrated are the sole deduction,  
225 view and responsibility of the researchers and do not reflect the official position and sentiments of the funders.  
226

227 **Acknowledgments:** We thank Dr Caroline F. Dalton (Sheffield Hallam University) and Drs Amanda Barnes and Ash-  
228 ley Smith (Agilent) for many helpful discussions about the Cytation system and its optimisation

229 **Conflicts of Interest** E.P. is a named inventor on a patent application covering the use of fluorescence methods for  
230 microclot detection in Long COVID. The funders had no role in the design of the study; in the collection, analyses, or  
231 interpretation of data; in the writing of the manuscript; or in the decision to publish the results.

232 **Disclaimer/Publisher's Note:** The statements, opinions and data contained in all publications are solely those of the individual  
233 author(s) and contributor(s) and not of MDPI and/or the editor(s). MDPI and/or the editor(s) disclaim responsibility for any injury  
234 to people or property resulting from any ideas, methods, instructions or products referred to in the content.

## 235 References

236

- 237 1. Nagareddy, P.; Smyth, S.S. Inflammation and thrombosis in cardiovascular disease. *Curr Opin Hematol* **2013**, *20*, 457-463,  
238 doi:10.1097/MOH.0b013e328364219d.
- 239 2. Stark, K.; Massberg, S. Interplay between inflammation and thrombosis in cardiovascular pathology. *Nat Rev Cardiol* **2021**,  
240 *18*, 666-682, doi:10.1038/s41569-021-00552-1.
- 241 3. Wagner, D.D.; Heger, L.A. Thromboinflammation: From Atherosclerosis to COVID-19. *Arterioscler Thromb Vasc Biol* **2022**,  
242 *42*, 1103-1112.
- 243 4. Kleinbongard, P.; Heusch, G. A fresh look at coronary microembolization. *Nat Rev Cardiol* **2022**, *19*, 265-280,  
244 doi:10.1038/s41569-021-00632-2.
- 245 5. Lacey, M.J.; Raza, S.; Rehman, H.; Puri, R.; Bhatt, D.L.; Kalra, A. Coronary Embolism: A Systematic Review. *Cardiovasc*  
246 *Revasc Med* **2020**, *21*, 367-374, doi:10.1016/j.carrev.2019.05.012.
- 247 6. Nappi, F.; Nappi, P.; Gambardella, I.; Avtaar Singh, S.S. Thromboembolic Disease and Cardiac Thrombotic Complication  
248 in COVID-19: A Systematic Review. *Metabolites* **2022**, *12*, 889, doi:10.3390/metabo12100889.

- 249 7. Mackman, N.; Bergmeier, W.; Stouffer, G.A.; Weitz, J.I. Therapeutic strategies for thrombosis: new targets and approaches.  
250 *Nat Rev Drug Discov* **2020**, *19*, 333-352, doi:10.1038/s41573-020-0061-0.
- 251 8. Thakur, M.; Junho, C.V.C.; Bernhard, S.M.; Schindewolf, M.; Noels, H.; Doring, Y. NETs-Induced Thrombosis Impacts on  
252 Cardiovascular and Chronic Kidney Disease. *Circ Res* **2023**, *132*, 933-949, doi:10.1161/CIRCRESAHA.123.321750.
- 253 9. Lippi, G.; Mattiuzzi, C.; Favaloro, E.J. Novel and emerging therapies: thrombus-targeted fibrinolysis. *Semin Thromb Hemost*  
254 **2013**, *39*, 48-58, doi:10.1055/s-0032-1328935.
- 255 10. Jackson, S.P.; Darbousset, R.; Schoenwaelder, S.M. Thromboinflammation: challenges of therapeutically targeting  
256 coagulation and other host defense mechanisms. *Blood* **2019**, *133*, 906-918, doi:10.1182/blood-2018-11-882993.
- 257 11. Medi, C.; Hankey, G.J.; Freedman, S.B. Stroke risk and antithrombotic strategies in atrial fibrillation. *Stroke* **2010**, *41*,  
258 2705-2713, doi:10.1161/STROKEAHA.110.589218.
- 259 12. Bikdeli, B.; Madhavan, M.V.; Jimenez, D.; Chuich, T.; Dreyfus, I.; Driggin, E.; Nigoghossian, C.; Ageno, W.; Madjid, M.;  
260 Guo, Y.; et al. COVID-19 and Thrombotic or Thromboembolic Disease: Implications for Prevention, Antithrombotic  
261 Therapy, and Follow-up. *J Am Coll Cardiol* **2020**, *75*, 2950-2973, doi:10.1016/j.jacc.2020.04.031.
- 262 13. Grobler, C.; Maphumulo, S.C.; Grobelaar, L.M.; Bredenkamp, J.; Laubscher, J.; Lourens, P.J.; Steenkamp, J.; Kell, D.B.;  
263 Pretorius, E. COVID-19: The Rollercoaster of Fibrin(ogen), D-dimer, von Willebrand Factor, P-selectin and Their  
264 Interactions with Endothelial Cells, Platelets and Erythrocytes. *Int J Mol Sci* **2020**, *21*, 5168,  
265 doi:<https://doi.org/10.3390/ijms21145168>.
- 266 14. Greer, I.A.; Brenner, B.; Gris, J.C. Antithrombotic treatment for pregnancy complications: which path for the journey to  
267 precision medicine? *Br J Haematol* **2014**, *165*, 585-599, doi:10.1111/bjh.12813.
- 268 15. Undas, A.; Brummel-Ziedins, K.; Mann, K.G. Why does aspirin decrease the risk of venous thromboembolism? On old  
269 and novel antithrombotic effects of acetyl salicylic acid. *J Thromb Haemost* **2014**, *12*, 1776-1787, doi:10.1111/jth.12728.
- 270 16. Wang, C.; Chen, J.; Tian, W.; Han, Y.; Xu, X.; Ren, T.; Tian, C.; Chen, C. Natto: A medicinal and edible food with health  
271 function. *Chin Herb Med* **2023**, *15*, 349-359, doi:10.1016/j.chmed.2023.02.005.
- 272 17. Lampe, B.J.; English, J.C. Toxicological assessment of nattokinase derived from *Bacillus subtilis* var. *natto*. *Food Chem Toxicol*  
273 **2016**, *88*, 87-99, doi:10.1016/j.fct.2015.12.025.
- 274 18. Ruiz Sella, S.R.B.; Bueno, T.; de Oliveira, A.A.B.; Karp, S.G.; Soccol, C.R. *Bacillus subtilis* natto as a potential probiotic in  
275 animal nutrition. *Crit Rev Biotechnol* **2021**, *41*, 355-369, doi:10.1080/07388551.2020.1858019.
- 276 19. Afzaal, M.; Saeed, F.; Islam, F.; Ateeq, H.; Asghar, A.; Shah, Y.A.; Ofoedu, C.E.; Chacha, J.S. Nutritional Health Perspective  
277 of Natto: A Critical Review. *Biochem Res Int* **2022**, *2022*, 5863887, doi:10.1155/2022/5863887.
- 278 20. Teramoto, N.; Sato, K.; Wada, T.; Nishikawa, Y.; Kage-Nakadai, E. Impacts of *Bacillus subtilis* var. *natto* on the lifespan and  
279 stress resistance of *Caenorhabditis elegans*. *J Appl Microbiol* **2023**, *134*, lxad082, doi:10.1093/jambio/lxad082.
- 280 21. Sumi, H.; Hamada, H.; Tsushima, H.; Mihara, H.; Muraki, H. A novel fibrinolytic enzyme (nattokinase) in the vegetable  
281 cheese Natto; a typical and popular soybean food in the Japanese diet. *Experientia* **1987**, *43*, 1110-1111,  
282 doi:10.1007/BF01956052.
- 283 22. Sawamura, S. On the micro-organisms of natto *Bull. Coll. Agric. Tokyo Imperial Univ.* **1906**, *7*, 107-110.
- 284 23. Oshima, K. The properties of protease A, the proteolytic enzyme of natto bacteria. *J. Soc. Agric. For. Sapporo* **1925**, *71*,  
285 387-403.
- 286 24. Fujita, M.; Hong, K.; Ito, Y.; Misawa, S.; Takeuchi, N.; Kariya, K.; Nishimuro, S. Transport of nattokinase across the rat  
287 intestinal tract. *Biol Pharm Bull* **1995**, *18*, 1194-1196, doi:10.1248/bpb.18.1194.
- 288 25. Sumi, H.; Hamada, H.; Nakanishi, K.; Hiratani, H. Enhancement of the fibrinolytic activity in plasma by oral  
289 administration of nattokinase. *Acta Haematol* **1990**, *84*, 139-143, doi:10.1159/000205051.

- 290 26. Sumi, H.; Yanagisawa, Y.; Yatagai, C.; Saito, J. Natto bacillus as an oral fibrinolytic agent: Nattokinase activity and the  
291 ingestion effect of *Bacillus subtilis natto*. *Food Science and Technology Research* **2004**, *10*, 17-20.
- 292 27. Chen, H.; McGowan, E.M.; Ren, N.; Lal, S.; Nassif, N.; Shad-Kaneez, F.; Qu, X.; Lin, Y. Nattokinase: A Promising  
293 Alternative in Prevention and Treatment of Cardiovascular Diseases. *Biomarker Insights* **2018**, *13*, 1177271918785130,  
294 doi:10.1177/1177271918785130.
- 295 28. Ero, M.P.; Ng, C.M.; Mihailovski, T.; Harvey, N.R.; Lewis, B.H. A pilot study on the serum pharmacokinetics of  
296 nattokinase in humans following a single, oral, daily dose. *Altern Ther Health Med* **2013**, *19*, 16-19.
- 297 29. Dabbagh, F.; Negahdaripour, M.; Berenjian, A.; Behfar, A.; Mohammadi, F.; Zamani, M.; Iraji, C.; Ghasemi, Y.  
298 Nattokinase: production and application. *Appl Microbiol Biotechnol* **2014**, *98*, 9199-9206, doi:10.1007/s00253-014-6135-3.
- 299 30. Kapoor, R.; Harde, H.; Jain, S.; Panda, A.K.; Panda, B.P. Downstream Processing, Formulation Development and  
300 Antithrombotic Evaluation of Microbial Nattokinase. *J Biomed Nanotechnol* **2015**, *11*, 1213-1224, doi:10.1166/jbn.2015.2071.
- 301 31. Zhou, X.Q.; Liu, L.Z.; Zeng, X.R. Research progress on the utilisation of embedding technology and suitable delivery  
302 systems for improving the bioavailability of nattokinase: A review. *Food Structure-Netherlands* **2021**, *30*.
- 303 32. Liu, S.; Zhu, J.; Liu, C.; Li, J.; Li, Z.; Zhao, J.; Liu, H. Synthesis of sustained release/controlled release nanoparticles carrying  
304 nattokinase and their application in thrombolysis. *Pharmazie* **2021**, *76*, 145-149, doi:10.1691/ph.2021.0155.
- 305 33. Priya, V.; Samridhi; Singh, N.; Dash, D.; Muthu, M.S. Nattokinase Encapsulated Nanomedicine for Targeted Thrombolysis:  
306 Development, Improved in Vivo Thrombolytic Effects, and Ultrasound/Photoacoustic Imaging. *Mol Pharm* **2024**, *21*,  
307 283-302, doi:10.1021/acs.molpharmaceut.3c00830.
- 308 34. Wei, X.; Luo, M.; Xie, Y.; Yang, L.; Li, H.; Xu, L.; Liu, H. Strain screening, fermentation, separation, and encapsulation for  
309 production of nattokinase functional food. *Appl Biochem Biotechnol* **2012**, *168*, 1753-1764, doi:10.1007/s12010-012-9894-2.
- 310 35. Peng, Y.; Yang, X.; Zhang, Y. Microbial fibrinolytic enzymes: an overview of source, production, properties, and  
311 thrombolytic activity in vivo. *Appl Microbiol Biotechnol* **2005**, *69*, 126-132, doi:10.1007/s00253-005-0159-7.
- 312 36. Li, D.; Hou, L.; Hu, M.; Gao, Y.; Tian, Z.; Fan, B.; Li, S.; Wang, F. Recent Advances in Nattokinase-Enriched Fermented  
313 Soybean Foods: A Review. *Foods* **2022**, *11*, 1867, doi:10.3390/foods11131867.
- 314 37. Kurosawa, Y.; Nirengi, S.; Homma, T.; Esaki, K.; Ohta, M.; Clark, J.F.; Hamaoka, T. A single-dose of oral nattokinase  
315 potentiates thrombolysis and anti-coagulation profiles. *Sci Rep* **2015**, *5*, 11601, doi:10.1038/srep11601.
- 316 38. Selvarajan, E.; Bhatnagar, N. Nattokinase: an updated critical review on challenges and perspectives. *Cardiovasc Hematol*  
317 *Agents Med Chem* **2017**, *15*, 126-135, doi:10.2174/1871525716666171207153332.
- 318 39. Weng, Y.; Yao, J.; Sparks, S.; Wang, K.Y. Nattokinase: An Oral Antithrombotic Agent for the Prevention of Cardiovascular  
319 Disease. *Int J Mol Sci* **2017**, *18*, 523, doi:10.3390/ijms18030523.
- 320 40. Derosa, G.; Maffioli, P.; D'Angelo, A.; Di Pierro, F. Nutraceutical Approach to Preventing Coronavirus Disease 2019 and  
321 Related Complications. *Front Immunol* **2021**, *12*, 582556, doi:10.3389/fimmu.2021.582556.
- 322 41. Takagaki, S.; Suzuki, M.; Suzuki, E.; Hasumi, K. Unsaturated fatty acids enhance the fibrinolytic activity of subtilisin NAT  
323 (nattokinase). *J Food Biochem* **2020**, *44*, e13326, doi:10.1111/jfbc.13326.
- 324 42. Li, X.M.; Long, J.Z.; Gao, Q.; Pan, M.Y.; Wang, J.; Yang, F.J.; Zhang, Y. Nattokinase Supplementation and Cardiovascular  
325 Risk Factors: A Systematic Review and Meta-Analysis of Randomized Controlled Trials. *Rev Cardiovasc Med* **2023**, *24*, 234,  
326 doi:<https://doi.org/10.31083/j.rcm2408234>.
- 327 43. Jamali, N.; Vahedi, F.; Fard, E.S.; Taheri-Anganehd, M.; Taghvimi, S.; Khatami, S.H.; Ghasemi, H.; Movahedpour, A.  
328 Nattokinase: Structure, applications and sources. *Biocatal Agric Biotechnol* **2023**, *47*, 102564,  
329 doi:<https://doi.org/10.1016/j.bcab.2022.102564>.
- 330 44. Yuan, L.; Liangqi, C.; Xiyu, T.; Jinyao, L. Biotechnology, Bioengineering and Applications of *Bacillus* Nattokinase.  
331 *Biomolecules* **2022**, *12*, 980, doi:10.3390/biom12070980.

- 332 45. Nara, N.; Kurosawa, Y.; Fuse-Hamaoka, S.; Kuroiwa, M.; Endo, T.; Tanaka, R.; Kime, R.; Hamaoka, T. A single dose of oral  
333 nattokinase accelerates skin temperature recovery after cold water immersion: A double-blind, placebo-controlled  
334 crossover study. *Heliyon* **2023**, *9*, e17951, doi:10.1016/j.heliyon.2023.e17951.
- 335 46. Di Micco, P.; Bernardi, F.F.; Camporese, G.; Biglietto, M.; Perrella, A.; Ciarambino, T.; Russo, V.; Imbalzano, E. Nattokinase  
336 historical sketch on experimental and clinical evidence *Ital J Med* **2023**, *17*, 1583, doi:10.4081/itjm.2023.1583
- 337 47. Kawamata, T.; Wakimoto, A.; Nishikawa, T.; Ikezawa, M.; Hamada, M.; Inoue, Y.; Kulathunga, K.; Salim, F.N.; Kanai, M.;  
338 Nishino, T.; et al. Natto consumption suppresses atherosclerotic plaque progression in LDL receptor-deficient mice  
339 transplanted with iRFP-expressing hematopoietic cells. *Sci Rep* **2023**, *13*, 22469, doi:10.1038/s41598-023-48562-y.
- 340 48. Sun, R.; Li, D.; Sun, M.; Miao, X.; Jin, X.; Xu, X.; Su, Y.; Xu, H.; Wang, J.; Niu, H. *Bacillus natto* ameliorates obesity by  
341 regulating PI3K/AKT pathways in rats. *Biochem Biophys Res Commun* **2022**, *603*, 160-166, doi:10.1016/j.bbrc.2022.03.012.
- 342 49. Ibe, S.; Kumada, K.; Yoshida, K.; Otobe, K. Natto (fermented soybean) extract extends the adult lifespan of *Caenorhabditis*  
343 *elegans*. *Biosci Biotechnol Biochem* **2013**, *77*, 392-394, doi:10.1271/bbb.120726.
- 344 50. Guilherme do Prado, F.; Pagnoncelli, M.G.B.; de Melo Pereira, G.V.; Karp, S.G.; Soccol, C.R. Fermented Soy Products and  
345 Their Potential Health Benefits: A Review. *Microorganisms* **2022**, *10*, 1606, doi:10.3390/microorganisms10081606.
- 346 51. Yatagai, C.; Maruyama, M.; Kawahara, T.; Sumi, H. Nattokinase-promoted tissue plasminogen activator release from  
347 human cells. *Pathophysiol Haemost Thromb* **2008**, *36*, 227-232, doi:10.1159/000252817.
- 348 52. Takabayashi, T.; Imoto, Y.; Sakashita, M.; Kato, Y.; Tokunaga, T.; Yoshida, K.; Narita, N.; Ishizuka, T.; Fujieda, S.  
349 Nattokinase, profibrinolytic enzyme, effectively shrinks the nasal polyp tissue and decreases viscosity of mucus. *Allergol*  
350 *Int* **2017**, *66*, 594-602, doi:10.1016/j.alit.2017.03.007.
- 351 53. Hsia, C.H.; Shen, M.C.; Lin, J.S.; Wen, Y.K.; Hwang, K.L.; Cham, T.M.; Yang, N.C. Nattokinase decreases plasma levels of  
352 fibrinogen, factor VII, and factor VIII in human subjects. *Nutr Res* **2009**, *29*, 190-196, doi:10.1016/j.nutres.2009.01.009.
- 353 54. Wang, P.; Peng, C.; Xie, X.; Deng, X.; Weng, M. Research progress on the fibrinolytic enzymes produced from traditional  
354 fermented foods. *Food Sci Nutr* **2023**, *11*, 5675-5688, doi:10.1002/fsn3.3601.
- 355 55. Kumar, S.S.; Sabu, A. Fibrinolytic Enzymes for Thrombolytic Therapy. *Adv Exp Med Biol* **2019**, *1148*, 345-381,  
356 doi:10.1007/978-981-13-7709-9\_15.
- 357 56. Fang, M.; Yuan, B.; Wang, M.; Liu, J.; Wang, Z. Nattokinase: Insights into Biological Activity, Therapeutic Applications,  
358 and the Influence of Microbial Fermentation. *Fermentation* **2023**, *9*, 950, doi:<https://doi.org/10.3390/fermentation9110950>.
- 359 57. Hazare, C.; Bhagwat, P.; Singh, S.; Pillai, S. Diverse origins of fibrinolytic enzymes: A comprehensive review. *Heliyon* **2024**,  
360 *10*, e26668, doi:10.1016/j.heliyon.2024.e26668.
- 361 58. Diwan, D.; Usmani, Z.; Sharma, M.; Nelson, J.W.; Thakur, V.K.; Christie, G.; Molina, G.; Gupta, V.K. Thrombolytic  
362 Enzymes of Microbial Origin: A Review. *Int J Mol Sci* **2021**, *22*, 10468.
- 363 59. Kotb, E. Activity assessment of microbial fibrinolytic enzymes. *Appl Microbiol Biotechnol* **2013**, *97*, 6647-6665,  
364 doi:10.1007/s00253-013-5052-1.
- 365 60. Mousavi Ghahfarrokhi, S.S.; Mahdigholi, F.S.; Amin, M. Collateral beauty in the damages: an overview of cosmetics and  
366 therapeutic applications of microbial proteases. *Arch Microbiol* **2023**, *205*, 375, doi:10.1007/s00203-023-03713-7.
- 367 61. Wu, H.; Wang, H.; Xu, F.; Chen, J.; Duan, L.; Zhang, F. Acute toxicity and genotoxicity evaluations of Nattokinase, a  
368 promising agent for cardiovascular diseases prevention. *Regul Toxicol Pharmacol* **2019**, *103*, 205-209,  
369 doi:10.1016/j.yrtph.2019.02.006.
- 370 62. Gallelli, G.; Di Mizio, G.; Palleria, C.; Siniscalchi, A.; Rubino, P.; Muraca, L.; Cione, E.; Salerno, M.; De Sarro, G.; Gallelli, L.  
371 Data Recorded in Real Life Support the Safety of Nattokinase in Patients with Vascular Diseases. *Nutrients* **2021**, *13*, 2031,  
372 doi:10.3390/nu13062031.

- 373 63. Bresson, J.-L.; Burlingame, B.; Dean, T.; Fairweather-Tait, S.; Heinonen, M.; Hirsch-Ernst, K.I.; Mangelsdorf, I.; McArdle,  
374 H.; Naska, A.; Neuhäuser-Berthold, M.; et al. Safety of fermented soybean extract NSK-SD® as a novel food pursuant to  
375 Regulation (EC) No 258/97. *EFSA J* **2016**, *14*, 4541, doi:10.2903/j.efsa.2016.4541.
- 376 64. Yanagisawa, Y.; Chatake, T.; Chiba-Kamoshida, K.; Naito, S.; Ohsugi, T.; Sumi, H.; Yasuda, I.; Morimoto, Y. Purification,  
377 crystallization and preliminary X-ray diffraction experiment of nattokinase from *Bacillus subtilis* natto. *Acta Crystallogr Sect*  
378 *F Struct Biol Cryst Commun* **2010**, *66*, 1670-1673, doi:10.1107/S1744309110043137.
- 379 65. Yanagisawa, Y.; Chatake, T.; Naito, S.; Ohsugi, T.; Yatagai, C.; Sumi, H.; Kawaguchi, A.; Chiba-Kamosida, K.; Ogawa, M.;  
380 Adachi, T.; et al. X-ray structure determination and deuteration of nattokinase. *J Synchrotron Radiat* **2013**, *20*, 875-879,  
381 doi:10.1107/S0909049513020700.
- 382 66. Minh, N.H.; Trang, H.T.Q.; Van, T.B.; Loc, N.H. Production and purification of nattokinase from *Bacillus subtilis*. *Food*  
383 *Biotechnology* **2022**, *36*, 1-21.
- 384 67. Wang, C.; Du, M.; Zheng, D.; Kong, F.; Zu, G.; Feng, Y. Purification and characterization of nattokinase from *Bacillus*  
385 *subtilis* natto B-12. *J Agric Food Chem* **2009**, *57*, 9722-9729, doi:10.1021/jf901861v.
- 386 68. Fujita, M.; Nomura, K.; Hong, K.; Ito, Y.; Asada, A.; Nishimuro, S. Purification and characterization of a strong fibrinolytic  
387 enzyme (nattokinase) in the vegetable cheese natto, a popular soybean fermented food in Japan. *Biochem Biophys Res*  
388 *Commun* **1993**, *197*, 1340-1347, doi:10.1006/bbrc.1993.2624.
- 389 69. Yin, L.J.; Lin, H.H.; Jiang, S.T. Bioproperties of potent nattokinase from *Bacillus subtilis* YJ1. *J Agric Food Chem* **2010**, *58*,  
390 5737-5742, doi:10.1021/jf100290h.
- 391 70. Pagnoncelli, M.G.B.; Fernandes, M.J.; Rodrigues, C.; Soccol, C.R. Nattokinases. In *Current Developments in Biotechnology and*  
392 *Bioengineering: Production, Isolation and Purification of Industrial Products*, Pandey, A., Negi, S., Soccol, C.R., Eds.; Elsevier:  
393 Amsterdam, 2017; pp. 509-526.
- 394 71. Modi, A.; Raval, I.; Doshi, P.; Joshi, M.; Joshi, C.; Patel, A.K. Heterologous expression of recombinant nattokinase in  
395 *Escherichia coli* BL21(DE3) and media optimization for overproduction of nattokinase using RSM. *Protein Expr Purif* **2023**,  
396 *203*, 106198, doi:10.1016/j.pep.2022.106198.
- 397 72. Ni, H.; Guo, P.C.; Jiang, W.L.; Fan, X.M.; Luo, X.Y.; Li, H.H. Expression of nattokinase in *Escherichia coli* and renaturation  
398 of its inclusion body. *J Biotechnol* **2016**, *231*, 65-71, doi:10.1016/j.jbiotec.2016.05.034.
- 399 73. Liang, X.; Jia, S.; Sun, Y.; Chen, M.; Chen, X.; Zhong, J.; Huan, L. Secretory expression of nattokinase from *Bacillus subtilis*  
400 YF38 in *Escherichia coli*. *Mol Biotechnol* **2007**, *37*, 187-194, doi:10.1007/s12033-007-0060-y.
- 401 74. Liang, X.; Zhang, L.; Zhong, J.; Huan, L. Secretory expression of a heterologous nattokinase in *Lactococcus lactis*. *Appl*  
402 *Microbiol Biotechnol* **2007**, *75*, 95-101, doi:10.1007/s00253-006-0809-4.
- 403 75. Chen, P.T.; Chiang, C.J.; Chao, Y.P. Medium optimization for the production of recombinant nattokinase by *Bacillus*  
404 *subtilis* using response surface methodology. *Biotechnol Prog* **2007**, *23*, 1327-1332, doi:10.1021/bp070109b.
- 405 76. Chen, P.T.; Chiang, C.J.; Chao, Y.P. Strategy to approach stable production of recombinant nattokinase in *Bacillus subtilis*.  
406 *Biotechnol Prog* **2007**, *23*, 808-813, doi:10.1021/bp070108j.
- 407 77. Cai, D.; Zhu, C.; Chen, S. Microbial production of nattokinase: current progress, challenge and prospect. *World J Microbiol*  
408 *Biotechnol* **2017**, *33*, 84, doi:10.1007/s11274-017-2253-2.
- 409 78. Liu, Z.; Zheng, W.; Ge, C.; Cui, W.; Zhou, L.; Zhou, Z. High-level extracellular production of recombinant nattokinase in  
410 *Bacillus subtilis* WB800 by multiple tandem promoters. *BMC Microbiol* **2019**, *19*, 89, doi:10.1186/s12866-019-1461-3.
- 411 79. Liu, Z.; Zhao, H.; Han, L.; Cui, W.; Zhou, L.; Zhou, Z. Improvement of the acid resistance, catalytic efficiency, and  
412 thermostability of nattokinase by multisite-directed mutagenesis. *Biotechnol Bioeng* **2019**, *116*, 1833-1843,  
413 doi:10.1002/bit.26983.

- 414 80. Li, C.; Du, Z.; Qi, S.; Zhang, X.; Wang, M.; Zhou, Y.; Lu, H.; Gu, X.; Tian, H. Food-grade expression of nattokinase in  
415 *Lactobacillus delbrueckii* subsp. *bulgaricus* and its thrombolytic activity in vitro. *Biotechnol Lett* **2020**, *42*, 2179-2187,  
416 doi:10.1007/s10529-020-02974-2.
- 417 81. Wei, X.; Zhou, Y.; Chen, J.; Cai, D.; Wang, D.; Qi, G.; Chen, S. Efficient expression of nattokinase in *Bacillus licheniformis*:  
418 host strain construction and signal peptide optimization. *J Ind Microbiol Biotechnol* **2015**, *42*, 287-295,  
419 doi:10.1007/s10295-014-1559-4.
- 420 82. Guangbo, Y.; Min, S.; Wei, S.; Lixin, M.; Chao, Z.; Yaping, W.; Zunxi, H. Heterologous expression of nattokinase from *B.*  
421 *subtilis* *natto* using *Pichia pastoris* GS115 and assessment of its thrombolytic activity. *BMC Biotechnol* **2021**, *21*, 49,  
422 doi:10.1186/s12896-021-00708-4.
- 423 83. Sheng, Y.; Yang, J.; Wang, C.; Sun, X.; Yan, L. Microbial nattokinase: from synthesis to potential application. *Food Funct*  
424 **2023**, *14*, 2568-2585, doi:10.1039/d2fo03389e.
- 425 84. Urano, T.; Ihara, H.; Umemura, K.; Suzuki, Y.; Oike, M.; Akita, S.; Tsukamoto, Y.; Suzuki, I.; Takada, A. The profibrinolytic  
426 enzyme subtilisin NAT purified from *Bacillus subtilis* cleaves and inactivates plasminogen activator inhibitor type 1. *J Biol*  
427 *Chem* **2001**, *276*, 24690-24696, doi:10.1074/jbc.M101751200.
- 428 85. Jang, J.Y.; Kim, T.S.; Cai, J.; Kim, J.; Kim, Y.; Shin, K.; Kim, K.S.; Park, S.K.; Lee, S.P.; Choi, E.K.; et al. Nattokinase improves  
429 blood flow by inhibiting platelet aggregation and thrombus formation. *Lab Anim Res* **2013**, *29*, 221-225,  
430 doi:10.5625/lar.2013.29.4.221.
- 431 86. Wu, H.; Wang, Y.; Zhang, Y.; Xu, F.; Chen, J.; Duan, L.; Zhang, T.; Wang, J.; Zhang, F. Breaking the vicious loop between  
432 inflammation, oxidative stress and coagulation, a novel anti-thrombus insight of nattokinase by inhibiting LPS-induced  
433 inflammation and oxidative stress. *Redox Biol* **2020**, *32*, 101500, doi:10.1016/j.redox.2020.101500.
- 434 87. Fujita, M.; Ohnishi, K.; Takaoka, S.; Ogasawara, K.; Fukuyama, R.; Nakamuta, H. Antihypertensive effects of continuous  
435 oral administration of nattokinase and its fragments in spontaneously hypertensive rats. *Biol Pharm Bull* **2011**, *34*,  
436 1696-1701, doi:10.1248/bpb.34.1696.
- 437 88. Kim, J.Y.; Gum, S.N.; Paik, J.K.; Lim, H.H.; Kim, K.C.; Ogasawara, K.; Inoue, K.; Park, S.; Jang, Y.; Lee, J.H. Effects of  
438 nattokinase on blood pressure: a randomized, controlled trial. *Hypertens Res* **2008**, *31*, 1583-1588,  
439 doi:10.1291/hypres.31.1583.
- 440 89. Jensen, G.S.; Lenninger, M.; Ero, M.P.; Benson, K.F. Consumption of nattokinase is associated with reduced blood pressure  
441 and von Willebrand factor, a cardiovascular risk marker: results from a randomized, double-blind, placebo-controlled,  
442 multicenter North American clinical trial. *Integr Blood Press Control* **2016**, *9*, 95-104, doi:10.2147/IBPC.S99553.
- 443 90. Elbakry, M.M.M.; Mansour, S.Z.; Helal, H.; Ahmed, E.S.A. Nattokinase attenuates bisphenol A or gamma  
444 irradiation-mediated hepatic and neural toxicity by activation of Nrf2 and suppression of inflammatory mediators in rats.  
445 *Environ Sci Pollut Res Int* **2022**, *29*, 75086-75100, doi:10.1007/s11356-022-21126-9.
- 446 91. Maslarov, D.; Drenska, D.; Maslarova-Gelov, J.; Gelov, I. Understanding the concept of Nattokinase use: a few  
447 years after beginning. *Biotechnol Biotechnol Equip* **2023**, *37*, 2249552, doi:<https://doi.org/10.1080/13102818.2023.2249552>.
- 448 92. Chen, H.; Chen, J.; Zhang, F.; Li, Y.; Wang, R.; Zheng, Q.; Zhang, X.; Zeng, J.; Xu, F.; Lin, Y. Effective management of  
449 atherosclerosis progress and hyperlipidemia with nattokinase: A clinical study with 1,062 participants. *Front Cardiovasc*  
450 *Med* **2022**, *9*, 964977, doi:10.3389/fcvm.2022.964977.
- 451 93. Pretorius, E.; Swanepoel, A.C.; Oberholzer, H.M.; van der Spuy, W.J.; Duim, W.; Wessels, P.F. A descriptive investigation  
452 of the ultrastructure of fibrin networks in thrombo-embolic ischemic stroke. *J Thromb Thrombolysis* **2011**, *31*, 507-513,  
453 doi:10.1007/s11239-010-0538-5.
- 454 94. Pretorius, E. The use of a desktop scanning electron microscope as a diagnostic tool in studying fibrin networks of  
455 thrombo-embolic ischemic stroke. *Ultrastruct Pathol* **2011**, *35*, 245-250, doi:10.3109/01913123.2011.606659.

- 456 95. Pretorius, E.; Oberholzer, H.M.; van der Spuy, W.J.; Swanepoel, A.C.; Soma, P. Qualitative scanning electron microscopy  
457 analysis of fibrin networks and platelet abnormalities in diabetes. *Blood Coagul Fibrinol* **2011**, *22*, 463-467,  
458 doi:10.1097/MBC.0b013e3283468a0d.
- 459 96. Pretorius, E.; Vermeulen, N.; Bester, J.; Lipinski, B.; Kell, D.B. A novel method for assessing the role of iron and its  
460 functional chelation in fibrin fibril formation: the use of scanning electron microscopy. *Toxicol Mech Methods* **2013**, *23*,  
461 352-359, doi:10.3109/15376516.2012.762082.
- 462 97. Pretorius, E.; Mbotwe, S.; Bester, J.; Robinson, C.J.; Kell, D.B. Acute induction of anomalous and amyloidogenic blood  
463 clotting by molecular amplification of highly substoichiometric levels of bacterial lipopolysaccharide. *J R Soc Interface* **2016**,  
464 *123*, 20160539, doi:<http://dx.doi.org/10.1098/rsif.2016.0539>.
- 465 98. Kell, D.B.; Pretorius, E. Proteins behaving badly. Substoichiometric molecular control and amplification of the initiation  
466 and nature of amyloid fibril formation: lessons from and for blood clotting. *Progr Biophys Mol Biol* **2017**, *123*, 16-41,  
467 doi:DOI <http://dx.doi.org/10.1016/j.pbiomolbio.2016.08.006>.
- 468 99. Pretorius, E.; Mbotwe, S.; Kell, D.B. Lipopolysaccharide-binding protein (LBP) reverses the amyloid state of fibrin seen in  
469 plasma of type 2 diabetics with cardiovascular comorbidities. *Sci Rep* **2017**, *7*, 9680.
- 470 100. Pretorius, E.; Page, M.J.; Hendricks, L.; Nkosi, N.B.; Benson, S.R.; Kell, D.B. Both lipopolysaccharide and lipoteichoic acids  
471 potently induce anomalous fibrin amyloid formation: assessment with novel Amytracker™ stains. bioRxiv preprint.  
472 *bioRxiv* **2017**, 143867.
- 473 101. Pretorius, E.; Page, M.J.; Engelbrecht, L.; Ellis, G.C.; Kell, D.B. Substantial fibrin amyloidogenesis in type 2 diabetes  
474 assessed using amyloid-selective fluorescent stains. *Cardiovasc Diabetol* **2017**, *16*, 141,  
475 doi:<https://doi.org/10.1186/s12933-017-0624-5>.
- 476 102. Pretorius, E.; Page, M.J.; Mbotwe, S.; Kell, D.B. Lipopolysaccharide-binding protein (LBP) can reverse the amyloid state of  
477 fibrin seen or induced in Parkinson's disease. *PlosOne* **2018**, *13*, e0192121, doi:<https://doi.org/10.1371/journal.pone.0192121>.
- 478 103. Pretorius, E.; Page, M.J.; Hendricks, L.; Nkosi, N.B.; Benson, S.R.; Kell, D.B. Both lipopolysaccharide and lipoteichoic acids  
479 potently induce anomalous fibrin amyloid formation: assessment with novel Amytracker™ stains. *J R Soc Interface* **2018**, *15*,  
480 20170941.
- 481 104. Pretorius, E.; Bester, J.; Page, M.J.; Kell, D.B. The potential of LPS-binding protein to reverse amyloid formation in plasma  
482 fibrin of individuals with Alzheimer-type dementia. *Frontiers Aging Neurosci* **2018**, *10*, 257, doi:doi:  
483 10.3389/fnagi.2018.00257
- 484 105. de Waal, G.M.; Engelbrecht, L.; Davis, T.; de Villiers, W.J.S.; Kell, D.B.; Pretorius, E. Correlative Light-Electron Microscopy  
485 detects lipopolysaccharide and its association with fibrin fibres in Parkinson's Disease, Alzheimer's Disease and Type 2  
486 Diabetes Mellitus. *Sci Rep* **2018**, *8*, 16798, doi:10.1038/s41598-018-35009-y.
- 487 106. Pretorius, E.; Venter, C.; Laubscher, G.J.; Kotze, M.J.; Oladejo, S.; Watson, L.R.; Rajaratnam, K.; Watson, B.W.; Kell, D.B.  
488 Prevalence of symptoms, comorbidities, fibrin amyloid microclots and platelet pathology in individuals with Long  
489 COVID/ Post-Acute Sequelae of COVID-19 (PASC) *Cardiovasc Diabetol* **2022**, *21*, 148,  
490 doi:<https://doi.org/10.1186/s12933-022-01579-5>.
- 491 107. Kell, D.B.; Pretorius, E. Are fibrin amyloid microclots a cause of autoimmunity in Long Covid and other post-infection  
492 diseases? *Biochem J* **2023**, *480*, 1217-1240, doi:<https://doi.org/10.1042/BCJ20230241>.
- 493 108. Candelise, N.; Baiardi, S.; Franceschini, A.; Rossi, M.; Parchi, P. Towards an improved early diagnosis of  
494 neurodegenerative diseases: the emerging role of in vitro conversion assays for protein amyloids. *Acta Neuropathol*  
495 *Commun* **2020**, *8*, 117, doi:10.1186/s40478-020-00990-x.
- 496 109. Poleggi, A.; Baiardi, S.; Ladogana, A.; Parchi, P. The Use of Real-Time Quaking-Induced Conversion for the Diagnosis of  
497 Human Prion Diseases. *Front Aging Neurosci* **2022**, *14*, 874734, doi:10.3389/fnagi.2022.874734.



- 498 110. Grobelaar, L.M.; Venter, C.; Vlok, M.; Ngoepe, M.; Laubscher, G.J.; Lourens, P.J.; Steenkamp, J.; Kell, D.B.; Pretorius, E.  
499 SARS-CoV-2 spike protein S1 induces fibrin(ogen) resistant to fibrinolysis: implications for microclot formation in  
500 COVID-19. *Biosci Rep* **2021**, *41*, BSR20210611, doi:10.1042/BSR20210611.
- 501 111. Kell, D.B.; Pretorius, E. The simultaneous occurrence of both hypercoagulability and hypofibrinolysis in blood and serum  
502 during systemic inflammation, and the roles of iron and fibrin(ogen). *Integr Biol* **2015**, *7*, 24-52, doi:10.1039/c4ib00173g.
- 503 112. Bergaglio, T.; Synhaińska, O.; Nirmalraj, P.N. 3D Holo-tomographic Mapping of COVID-19 Microclots in Blood to Assess  
504 Disease Severity. *ACS Chem Biomed Imaging* **2024**, online, doi:10.1101/2023.09.12.557318.
- 505 113. Stewart, K.L.; Radford, S.E. Amyloid plaques beyond Aβeta: a survey of the diverse modulators of amyloid aggregation.  
506 *Biophys Rev* **2017**, *9*, 405-419, doi:10.1007/s12551-017-0271-9.
- 507 114. Gligorijević, N.; Simeon, M.; Mirjana, R.; Steva, L.; Milan, N.; Tanja, Č.V.; Olgica, N. Ligand binding to fibrinogen  
508 influences its structure and function. *Biol Serb* **2021**, *43*, 24-31, doi:10.5281/zenodo.5512285.
- 509 115. Gligorijević, N.; Vasović, T.; Lević, S.; Miljević, Č.; Nedić, O.; Nikolić, M. Atypical antipsychotic clozapine binds fibrinogen  
510 and affects fibrin formation. *Int J Biol Macromol* **2020**, *154*, 142-149, doi:10.1016/j.ijbiomac.2020.03.119.
- 511 116. Liu, B.; Moloney, A.; Meehan, S.; Morris, K.; Thomas, S.E.; Serpell, L.C.; Hider, R.; Marciniak, S.J.; Lomas, D.A.; Crowther,  
512 D.C. Iron promotes the toxicity of amyloid beta peptide by impeding its ordered aggregation. *J Biol Chem* **2011**, *286*,  
513 4248-4256.
- 514 117. Louros, N.; Schymkowitz, J.; Rousseau, F. Mechanisms and pathology of protein misfolding and aggregation. *Nat Rev Mol*  
515 *Cell Biol* **2023**, *24*, 912-933, doi:10.1038/s41580-023-00647-2.
- 516 118. Xu, Y.; Maya-Martinez, R.; Guthertz, N.; Heath, G.R.; Manfield, I.W.; Breeze, A.L.; Sobott, F.; Foster, R.; Radford, S.E.  
517 Tuning the rate of aggregation of hIAPP into amyloid using small-molecule modulators of assembly. *Nat Commun* **2022**, *13*,  
518 1040, doi:10.1038/s41467-022-28660-7.
- 519 119. Heller, G.T.; Aprile, F.A.; Michaels, T.C.T.; Limbocker, R.; Perni, M.; Ruggeri, F.S.; Mannini, B.; Lohr, T.; Bonomi, M.;  
520 Camilloni, C.; et al. Small-molecule sequestration of amyloid-beta as a drug discovery strategy for Alzheimer's disease. *Sci*  
521 *Adv* **2020**, *6*, eabb5924, doi:10.1126/sciadv.abb5924.
- 522 120. Ziaunys, M.; Sneideris, T.; Smirnovas, V. Formation of distinct prion protein amyloid fibrils under identical experimental  
523 conditions. *Sci Rep* **2020**, *10*, 4572, doi:10.1038/s41598-020-61663-2.
- 524 121. Ziaunys, M.; Sakalauskas, A.; Mikalauskaite, K.; Snieckute, R.; Smirnovas, V. Temperature-Dependent Structural  
525 Variability of Prion Protein Amyloid Fibrils. *Int J Mol Sci* **2021**, *22*, 5075, doi:10.3390/ijms22105075.
- 526 122. Watts, J.C.; Condello, C.; Stohr, J.; Oehler, A.; Lee, J.; DeArmond, S.J.; Lannfelt, L.; Ingelsson, M.; Giles, K.; Prusiner, S.B.  
527 Serial propagation of distinct strains of Aβeta prions from Alzheimer's disease patients. *Proc Natl Acad Sci* **2014**, *111*,  
528 10323-10328, doi:10.1073/pnas.1408900111.
- 529 123. Han, Z.Z.; Kang, S.G.; Arce, L.; Westaway, D. Prion-like strain effects in tauopathies. *Cell Tissue Res* **2022**, 1-21,  
530 doi:10.1007/s00441-022-03620-1.
- 531 124. Shoup, D.; Priola, S.A. Cell biology of prion strains in vivo and in vitro. *Cell Tissue Res* **2022**,  
532 doi:10.1007/s00441-021-03572-y.
- 533 125. Bartz, J.C. Prion Strain Diversity. *Cold Spring Harb Perspect Med* **2016**, *6*, doi:10.1101/cshperspect.a024349.
- 534 126. Igel-Egalon, A.; Béringue, V.; Rezaei, H.; Sibille, P. Prion Strains and Transmission Barrier Phenomena. *Pathogens* **2018**, *7*, 5,  
535 doi:10.3390/pathogens7010005.
- 536 127. Scialò, C.; De Cecco, E.; Manganotti, P.; Legname, G. Prion and Prion-Like Protein Strains: Deciphering the Molecular  
537 Basis of Heterogeneity in Neurodegeneration. *Viruses* **2019**, *11*, 261, doi:10.3390/v11030261.
- 538 128. Levavasseur, E.; Privat, N.; Haïk, S. *In vitro* Modeling of Prion Strain Tropism. *Viruses* **2019**, *11*, 236, doi:10.3390/v11030236.

- 539 129. Peden, A.H.; Suleiman, S.; Barria, M.A. Understanding Intra-Species and Inter-Species Prion Conversion and Zoonotic  
540 Potential Using Protein Misfolding Cyclic Amplification. *Front Aging Neurosci* **2021**, *13*, 716452,  
541 doi:10.3389/fnagi.2021.716452.
- 542 130. Hoyt, F.; Alam, P.; Artikis, E.; Schwartz, C.L.; Hughson, A.G.; Race, B.; Baune, C.; Raymond, G.J.; Baron, G.S.; Kraus, A.; et  
543 al. Cryo-EM of prion strains from the same genotype of host identifies conformational determinants. *PLoS Pathog* **2022**, *18*,  
544 e1010947, doi:10.1371/journal.ppat.1010947.
- 545 131. Igel, A.; Fornara, B.; Rezaei, H.; Béringue, V. Prion assemblies: structural heterogeneity, mechanisms of formation, and  
546 role in species barrier. *Cell Tissue Res* **2023**, doi:10.1007/s00441-022-03700-2.
- 547 132. Sharma, A.; Bruce, K.L.; Chen, B.; Gyoneva, S.; Behrens, S.H.; Bommarius, A.S.; Chernoff, Y.O. Contributions of the Prion  
548 Protein Sequence, Strain, and Environment to the Species Barrier. *J Biol Chem* **2016**, *291*, 1277-1288,  
549 doi:10.1074/jbc.M115.684100.
- 550 133. Fändrich, M.; Meinhardt, J.; Grigorieff, N. Structural polymorphism of Alzheimer Abeta and other amyloid fibrils. *Prion*  
551 **2009**, *3*, 89-93.
- 552 134. Kodali, R.; Williams, A.D.; Chemuru, S.; Wetzel, R. Abeta(1-40) forms five distinct amyloid structures whose beta-sheet  
553 contents and fibril stabilities are correlated. *J Mol Biol* **2010**, *401*, 503-517, doi:10.1016/j.jmb.2010.06.023.
- 554 135. Fändrich, M.; Wulff, M.; Pedersen, J.S.; Otzen, D. Fibrillar Polymorphism In *Amyloid Fibrils and Prefibrillar Aggregates: Molecular and Biological Properties*, Otzen, D.E., Ed.; Wiley-VCH: Weinheim, 2013; pp. 321-343.
- 555
- 556 136. Tycko, R. Physical and structural basis for polymorphism in amyloid fibrils. *Protein Sci* **2014**, *23*, 1528-1539,  
557 doi:10.1002/pro.2544.
- 558 137. Lutter, L.; Serpell, C.J.; Tuite, M.F.; Xue, W.F. The molecular lifecycle of amyloid - Mechanism of assembly, mesoscopic  
559 organisation, polymorphism, suprastructures, and biological consequences. *Biochim Biophys Acta Proteins Proteom* **2019**,  
560 *1867*, 140257, doi:10.1016/j.bbapap.2019.07.010.
- 561 138. Arifin, M.I.; Hannaoui, S.; Chang, S.C.; Thapa, S.; Schatzl, H.M.; Gilch, S. Cervid Prion Protein Polymorphisms: Role in  
562 Chronic Wasting Disease Pathogenesis. *Int J Mol Sci* **2021**, *22*, 2271, doi:10.3390/ijms22052271.
- 563 139. Farzadfard, A.; Kunka, A.; Mason, T.O.; Larsen, J.A.; Norrild, R.K.; Dominguez, E.T.; Ray, S.; Buell, A.K. Thermodynamic  
564 characterization of amyloid polymorphism by microfluidic transient incomplete separation. *Chem Sci* **2024**, *15*, 2528-2544,  
565 doi:10.1039/d3sc05371g.
- 566 140. Pfeiffer, P.B.; Ugrina, M.; Schwierz, N.; Sigurdson, C.J.; Schmidt, M.; Fändrich, M. Cryo-EM Analysis of the Effect of  
567 Seeding with Brain-derived Abeta Amyloid Fibrils. *J Mol Biol* **2024**, *436*, 168422, doi:10.1016/j.jmb.2023.168422.
- 568 141. Mishra, S. Emerging Trends in Cryo-EM-based Structural Studies of Neuropathological Amyloids. *J Mol Biol* **2023**, *435*,  
569 168361, doi:10.1016/j.jmb.2023.168361.
- 570 142. Petkova, A.T.; Leapman, R.D.; Guo, Z.; Yau, W.M.; Mattson, M.P.; Tycko, R. Self-propagating, molecular-level  
571 polymorphism in Alzheimer's beta-amyloid fibrils. *Science* **2005**, *307*, 262-265, doi:10.1126/science.1105850.
- 572 143. Peccati, F.; Pantaleone, S.; Solans-Monfort, X.; Sodupe, M. Fluorescent Markers for Amyloid-beta Detection:  
573 Computational Insights. *Isr J Chem* **2017**, *57*, 686-698, doi:10.1002/ijch.201600114.
- 574 144. Peccati, F.; Pantaleone, S.; Riffet, V.; Solans-Monfort, X.; Contreras-Garcia, J.; Guallar, V.; Sodupe, M. Binding of Thioflavin  
575 T and Related Probes to Polymorphic Models of Amyloid-beta Fibrils. *J Phys Chem B* **2017**, *121*, 8926-8934,  
576 doi:10.1021/acs.jpcc.7b06675.
- 577 145. Shorter, J.; Lindquist, S. Prions as adaptive conduits of memory and inheritance. *Nat Rev Genet* **2005**, *6*, 435-450,  
578 doi:10.1038/nrg1616.

- 579 146. Wiltzius, J.J.W.; Landau, M.; Nelson, R.; Sawaya, M.R.; Apostol, M.I.; Goldschmidt, L.; Soriaga, A.B.; Cascio, D.;  
580 Rajashankar, K.; Eisenberg, D. Molecular mechanisms for protein-encoded inheritance. *Nat Struct Mol Biol* **2009**, *16*,  
581 973-978, doi:10.1038/nsmb.1643.
- 582 147. Liebman, S.W.; Chernoff, Y.O. Prions in yeast. *Genetics* **2012**, *191*, 1041-1072, doi:10.1534/genetics.111.137760.
- 583 148. Wickner, R.B.; Shewmaker, F.P.; Bateman, D.A.; Edskes, H.K.; Gorkovskiy, A.; Dayani, Y.; Bezsonov, E.E. Yeast prions:  
584 structure, biology, and prion-handling systems. *Microbiol Mol Biol Rev* **2015**, *79*, 1-17, doi:10.1128/MMBR.00041-14.
- 585 149. Wickner, R.B.; Edskes, H.K.; Gorkovskiy, A.; Bezsonov, E.E.; Stroobant, E.E. Yeast and Fungal Prions: Amyloid-Handling  
586 Systems, Amyloid Structure, and Prion Biology. *Adv Genet* **2016**, *93*, 191-236, doi:10.1016/bs.adgen.2015.12.003.
- 587 150. Bao, J.; Wen, Z.; Kim, M.; Zhao, X.; Lee, B.N.; Jung, S.H.; Davatzikos, C.; Saykin, A.J.; Thompson, P.M.; Kim, D.; et al.  
588 Identifying highly heritable brain amyloid phenotypes through mining Alzheimer's imaging and sequencing biobank data.  
589 *Pac Symp Biocomput* **2022**, *27*, 109-120.
- 590 151. Telling, G.C. The shape of things to come: structural insights into how prion proteins encipher heritable information. *Nat*  
591 *Commun* **2022**, *13*, 4003, doi:10.1038/s41467-022-31460-8.
- 592 152. Jarrett, J.T.; Lansbury, P.T., Jr. Seeding "one-dimensional crystallization" of amyloid: a pathogenic mechanism in  
593 Alzheimer's disease and scrapie? *Cell* **1993**, *73*, 1055-1058, doi:10.1016/0092-8674(93)90635-4.
- 594 153. Luers, L.; Bannach, O.; Stöhr, J.; Wördehoff, M.M.; Wolff, M.; Nagel-Steger, L.; Riesner, D.; Willbold, D.; Birkmann, E.  
595 Seeded fibrillation as molecular basis of the species barrier in human prion diseases. *PLoS One* **2013**, *8*, e72623,  
596 doi:10.1371/journal.pone.0072623.
- 597 154. Pinotsi, D.; Michel, C.H.; Buell, A.K.; Laine, R.F.; Mahou, P.; Dobson, C.M.; Kaminski, C.F.; Kaminski Schierle, G.S.  
598 Nanoscopic insights into seeding mechanisms and toxicity of alpha-synuclein species in neurons. *Proc Natl Acad Sci* **2016**,  
599 *113*, 3815-3819, doi:10.1073/pnas.1516546113.
- 600 155. Kaufman, S.K.; Thomas, T.L.; Del Tredici, K.; Braak, H.; Diamond, M.I. Characterization of tau prion seeding activity and  
601 strains from formaldehyde-fixed tissue. *Acta Neuropathol Commun* **2017**, *5*, 41, doi:10.1186/s40478-017-0442-8.
- 602 156. Mudher, A.; Colin, M.; Dujardin, S.; Medina, M.; Dewachter, I.; Alavi Naini, S.M.; Mandelkow, E.M.; Mandelkow, E.; Buée,  
603 L.; Goedert, M.; et al. What is the evidence that tau pathology spreads through prion-like propagation? *Acta Neuropathol*  
604 *Commun* **2017**, *5*, 99, doi:10.1186/s40478-017-0488-7.
- 605 157. Manca, M.; Kraus, A. Defining the Protein Seeds of Neurodegeneration using Real-Time Quaking-Induced Conversion  
606 Assays. *Biomolecules* **2020**, *10*, doi:10.3390/biom10091233.
- 607 158. Peng, C.; Trojanowski, J.Q.; Lee, V.M. Protein transmission in neurodegenerative disease. *Nat Rev Neurol* **2020**, *16*, 199-212,  
608 doi:10.1038/s41582-020-0333-7.
- 609 159. Standke, H.G.; Kraus, A. Seed amplification and RT-QuIC assays to investigate protein seed structures and strains. *Cell*  
610 *Tissue Res* **2022**, doi:10.1007/s00441-022-03595-z.
- 611 160. Thacker, D.; Sanagavarapu, K.; Frohm, B.; Meisl, G.; Knowles, T.P.J.; Linse, S. The role of fibril structure and surface  
612 hydrophobicity in secondary nucleation of amyloid fibrils. *Proc Natl Acad Sci U S A* **2020**, *117*, 25272-25283,  
613 doi:10.1073/pnas.2002956117.
- 614 161. Coysh, T.; Mead, S. The Future of Seed Amplification Assays and Clinical Trials. *Front Aging Neurosci* **2022**, *14*, 872629,  
615 doi:10.3389/fnagi.2022.872629.
- 616 162. Vaneyck, J.; Yousif, T.A.; Segers-Nolten, I.; Blum, C.; Claessens, M.M.A.E. Quantitative Seed Amplification Assay: A  
617 Proof-of-Principle Study. *J Phys Chem B* **2023**, *127*, 1735-1743, doi:10.1021/acs.jpcc.2c08326.
- 618 163. Sulskis, D.; Sneideriene, G.; Ziaunys, M.; Smirnovas, V. The seeding barrier between human and Syrian hamster prion  
619 protein amyloid fibrils is determined by beta2-alpha2 loop sequence elements. *Int J Biol Macromol* **2023**, *238*, 124038,  
620 doi:10.1016/j.ijbiomac.2023.124038.

- 621 164. Scheres, S.H.W.; Ryskeldi-Falcon, B.; Goedert, M. Molecular pathology of neurodegenerative diseases by cryo-EM of  
622 amyloids. *Nature* **2023**, *621*, 701-710, doi:10.1038/s41586-023-06437-2.
- 623 165. Yang, Y.; Arseni, D.; Zhang, W.; Huang, M.; Lovestam, S.; Schweighauser, M.; Kotecha, A.; Murzin, A.G.; Peak-Chew, S.Y.;  
624 Macdonald, J.; et al. Cryo-EM structures of amyloid-beta 42 filaments from human brains. *Science* **2022**, *375*, 167-172,  
625 doi:10.1126/science.abm7285.
- 626 166. Heerde, T.; Rennegarbe, M.; Biedermann, A.; Savran, D.; Pfeiffer, P.B.; Hitzemberger, M.; Baur, J.; Puscalau-Girtu, I.;  
627 Zacharias, M.; Schwierz, N.; et al. Cryo-EM demonstrates the in vitro proliferation of an ex vivo amyloid fibril  
628 morphology by seeding. *Nat Commun* **2022**, *13*, 85, doi:10.1038/s41467-021-27688-5.
- 629 167. Bondarev, S.A.; Antonets, K.S.; Kajava, A.V.; Nizhnikov, A.A.; Zhouravleva, G.A. Protein Co-Aggregation Related to  
630 Amyloids: Methods of Investigation, Diversity, and Classification. *Int J Mol Sci* **2018**, *19*, 2292, doi:10.3390/ijms19082292.
- 631 168. Sidhu, A.; Segers-Nolten, I.; Subramaniam, V. Conformational Compatibility Is Essential for Heterologous Aggregation of  
632 alpha-Synuclein. *ACS Chem Neurosci* **2016**, *7*, 719-727, doi:10.1021/acschemneuro.5b00322.
- 633 169. Ivanova, M.I.; Lin, Y.; Lee, Y.H.; Zheng, J.; Ramamoorthy, A. Biophysical processes underlying cross-seeding in amyloid  
634 aggregation and implications in amyloid pathology. *Biophys Chem* **2021**, *269*, 106507, doi:10.1016/j.bpc.2020.106507.
- 635 170. Subedi, S.; Sasidharan, S.; Nag, N.; Saudagar, P.; Tripathi, T. Amyloid Cross-Seeding: Mechanism, Implication, and  
636 Inhibition. *Molecules* **2022**, *27*, 1776, doi:10.3390/molecules27061776.
- 637 171. Chatterjee, D.; Jacob, R.S.; Ray, S.; Navalkar, A.; Singh, N.; Sengupta, S.; Gadhe, L.; Kadu, P.; Datta, D.; Paul, A.; et al.  
638 Co-aggregation and secondary nucleation in the life cycle of human prolactin/galanin functional amyloids. *Elife* **2022**, *11*,  
639 doi:10.7554/eLife.73835.
- 640 172. Semerdzhiev, S.A.; Segers-Nolten, I.; van der Schoot, P.; Blum, C.; Claessens, M.M.S.E. SARS-CoV-2 N-protein induces the  
641 formation of composite alpha-synuclein/N-protein fibrils that transform into a strain of alpha-synuclein fibrils. *Nanoscale*  
642 **2023**, *15*, 18337-18346, doi:10.1039/d3nr03556e.
- 643 173. Willbold, D.; Strodel, B.; Schroder, G.F.; Hoyer, W.; Heise, H. Amyloid-type Protein Aggregation and Prion-like Properties  
644 of Amyloids. *Chem Rev* **2021**, *121*, 8285-8307, doi:10.1021/acs.chemrev.1c00196.
- 645 174. Zielinski, M.; Röder, C.; Schröder, G.F. Challenges in sample preparation and structure determination of amyloids by  
646 cryo-EM. *J Biol Chem* **2021**, *297*, 100938, doi:10.1016/j.jbc.2021.100938.
- 647 175. Pretorius, E.; Vlok, M.; Venter, C.; Bezuidenhout, J.A.; Laubscher, G.J.; Steenkamp, J.; Kell, D.B. Persistent clotting protein  
648 pathology in Long COVID/ Post-Acute Sequelae of COVID-19 (PASC) is accompanied by increased levels of antiplasmin.  
649 *Cardiovasc Diabetol* **2021**, *20*, 172.
- 650 176. Turner, S.; Khan, M.A.; Putrino, D.; Woodcock, A.; Kell, D.B.; Pretorius, E. Long COVID: pathophysiological factors and  
651 abnormal coagulation. *Trends Endocrinol Metab* **2023**, *34*, 321-344, doi:<https://doi.org/10.1016/j.tem.2023.03.002>.
- 652 177. Turner, S.; Laubscher, G.J.; Khan, M.A.; Kell, D.B.; Pretorius, E. Accelerating discovery: A novel flow cytometric method  
653 for detecting fibrin(ogen) amyloid microclots using long COVID as a model *Heliyon* **2023**, *9*, e19605,  
654 doi:<https://doi.org/10.1016/j.heliyon.2023.e19605>.
- 655 178. Turner, S.; Naidoo, C.A.; Usher, T.J.; Kruger, A.; Venter, C.; Laubscher, G.J.; Khan, M.A.; Kell, D.B.; Pretorius, E. Increased  
656 Levels of Inflammatory and Endothelial Biomarkers in Blood of Long COVID Patients Point to Thrombotic Endothelialitis.  
657 *Semin Thromb Hemost* **2023**, doi:10.1055/s-0043-1769014.
- 658 179. Dalton, C.F.; de Oliveira, M.I.R.; Stafford, P.; Peake, N.; Kane, B.; Higham, A.; Singh, D.; Jackson, N.; Davies, H.; Price, D.;  
659 et al. Increased fibrinoid microclot counts in platelet-poor plasma are associated with Long COVID. *medRxiv* **2024**,  
660 2024.2004.2004.24305318, doi:10.1101/2024.04.04.24305318.

- 661 180. Nunes, J.M.; Kruger, A.; Proal, A.; Kell, D.B.; Pretorius, E. The Occurrence of Hyperactivated Platelets and Fibrinolytic  
662 Microclots in Myalgic Encephalomyelitis/Chronic Fatigue Syndrome (ME/CFS). *Pharmaceuticals (Basel)* **2022**, *15*, 931,  
663 doi:10.3390/ph15080931.
- 664 181. Nunes, J.M.; Kell, D.B.; Pretorius, E. Cardiovascular and haematological pathology in Myalgic Encephalomyelitis/Chronic  
665 Fatigue Syndrome (ME/CFS): a role for Viruses. *Blood Rev* **2023**, *60*, 101075, doi:10.1016/j.blre.2023.101075.
- 666 182. Grobelaar, L.M.; Kruger, A.; Venter, C.; Burger, E.M.; Laubscher, G.J.; Maponga, T.G.; Kotze, M.J.; Kwaan, H.C.; Miller,  
667 J.B.; Fulkerson, D.; et al. Relative hypercoagulopathy of the SARS-CoV-2 Beta and Delta variants when compared to the  
668 less severe Omicron variants is related to TEG parameters, the extent of fibrin amyloid microclots, and the severity of  
669 clinical illness. *Semin Thromb Haemost* **2022**, *48*, 858-868, doi:10.1055/s-0042-1756306.
- 670 183. Pretorius, E.; Kell, D.B. A perspective on how microscopy imaging of fibrinolytic microclots and platelet pathology may be  
671 applied in clinical investigations. *Semin Thromb Haemost* **2023**, doi:10.1055/s-0043-1774796.
- 672 184. Kell, D.B.; Laubscher, G.J.; Pretorius, E. A central role for amyloid fibrin microclots in long COVID/PASC: origins and  
673 therapeutic implications. *Biochem J* **2022**, *479*, 537-559, doi:<https://doi.org/10.1042/BCJ20220016>.
- 674 185. Kell, D.B.; Pretorius, E. The potential role of ischaemia-reperfusion injury in chronic, relapsing diseases such as  
675 rheumatoid arthritis, long COVID and ME/CFS: evidence, mechanisms, and therapeutic implications. *Biochem J* **2022**, *479*,  
676 1653-1708.
- 677 186. Kell, D.B.; Khan, M.A.; Kane, B.; Lip, G.Y.H.; Pretorius, E. The role of fibrinolytic microclots in Postural Orthostatic  
678 Tachycardia Syndrome (POTS): focus on Long COVID. *J Personalised Medicine* **2024**, *14*, 170,  
679 doi:<https://doi.org/10.3390/jpm14020170>.
- 680 187. Schofield, J.; Abrams, S.T.; Jenkins, R.; Lane, S.; Wang, G.; Toh, C.H. Amyloid-fibrinogen aggregates ("microclots") predict  
681 risks of Disseminated Intravascular Coagulation and mortality. *Blood Adv* **2024**, doi:10.1182/bloodadvances.2023012473.
- 682 188. Appelman, B.; Charlton, B.T.; Goulding, R.P.; Kerkhoff, T.J.; Breedveld, E.A.; Noort, W.; Offringa, C.; Bloemers, F.W.; van  
683 Weeghel, M.; Schomakers, B.V.; et al. Muscle abnormalities worsen after post-exertional malaise in long COVID. *Nat*  
684 *Commun* **2024**, *15*, 17, doi:10.1038/s41467-023-44432-3.
- 685 189. Thagard, P. Explaining disease: Correlations, causes, and mechanisms. *Minds and Machines* **1998**, *8*, 61-78.
- 686 190. Thagard, P. *How scientists explain disease*; Princeton University Press: Princeton, NJ, 1999.
- 687 191. Thagard, P. Coherence, truth, and the development of scientific knowledge. *Philosophy of Science* **2007**, *74*, 28-47.
- 688 192. Thagard, P. Explanatory Coherence. *Reasoning: Studies of Human Inference and Its Foundations* **2008**, 471-513.
- 689 193. Nelson, R.; Sawaya, M.R.; Balbirnie, M.; Madsen, A.O.; Riekel, C.; Grothe, R.; Eisenberg, D. Structure of the cross-beta  
690 spine of amyloid-like fibrils. *Nature* **2005**, *435*, 773-778, doi:10.1038/nature03680.
- 691 194. Tycko, R.; Wickner, R.B. Molecular structures of amyloid and prion fibrils: consensus versus controversy. *Acc Chem Res*  
692 **2013**, *46*, 1487-1496, doi:10.1021/ar300282r.
- 693 195. Serpell, L.C.; Sunde, M.; Benson, M.D.; Tennent, G.A.; Pepys, M.B.; Fraser, P.E. The protofilament substructure of amyloid  
694 fibrils. *J Mol Biol* **2000**, *300*, 1033-1039, doi:10.1006/jmbi.2000.3908.
- 695 196. Jahn, T.R.; Makin, O.S.; Morris, K.L.; Marshall, K.E.; Tian, P.; Sikorski, P.; Serpell, L.C. The common architecture of  
696 cross-beta amyloid. *J Mol Biol* **2010**, *395*, 717-727, doi:10.1016/j.jmb.2009.09.039.
- 697 197. Morris, K.L.; Serpell, L.C. From Molecular to Supramolecular Amyloid Structures: Contributions from Fiber Diffraction  
698 and Electron Microscopy. In *Amyloid Fibrils and Prefibrillar Aggregates: Molecular and Biological Properties*, Otzen, D.E., Ed.;  
699 Wiley-VCH: Weinheim, 2013; pp. 63-84.
- 700 198. Iadanza, M.G.; Jackson, M.P.; Hewitt, E.W.; Ranson, N.A.; Radford, S.E. A new era for understanding amyloid structures  
701 and disease. *Nat Rev Mol Cell Bio* **2018**, *19*, 755-773, doi:10.1038/s41580-018-0060-8.

- 702 199. Thurber, K.R.; Yau, W.M.; Tycko, R. Structure of Amyloid Peptide Ribbons Characterized by Electron Microscopy, Atomic  
703 Force Microscopy, and Solid-State Nuclear Magnetic Resonance. *J Phys Chem B* **2024**, *128*, 1711-1723,  
704 doi:10.1021/acs.jpbc.3c07867.
- 705 200. Gremer, L.; Scholzel, D.; Schenk, C.; Reinartz, E.; Labahn, J.; Ravelli, R.B.G.; Tusche, M.; Lopez-Iglesias, C.; Hoyer, W.;  
706 Heise, H.; et al. Fibril structure of amyloid-beta(1-42) by cryo-electron microscopy. *Science* **2017**, *358*, 116-119,  
707 doi:10.1126/science.aao2825.
- 708 201. Chen, G.F.; Xu, T.H.; Yan, Y.; Zhou, Y.R.; Jiang, Y.; Melcher, K.; Xu, H.E. Amyloid beta: structure, biology and  
709 structure-based therapeutic development. *Acta Pharmacol Sin* **2017**, *38*, 1205-1235, doi:10.1038/aps.2017.28.
- 710 202. Gallardo, R.; Ranson, N.A.; Radford, S.E. Amyloid structures: much more than just a cross-beta fold. *Curr Opin Struct Biol*  
711 **2020**, *60*, 7-16, doi:10.1016/j.sbi.2019.09.001.
- 712 203. Greenwald, J.; Riek, R. Biology of amyloid: structure, function, and regulation. *Structure* **2010**, *18*, 1244-1260,  
713 doi:10.1016/j.str.2010.08.009.
- 714 204. Fändrich, M.; Schmidt, M.; Grigorieff, N. Recent progress in understanding Alzheimer's beta-amyloid structures. *Trends*  
715 *Biochem Sci* **2011**, *36*, 338-345, doi:10.1016/j.tibs.2011.02.002.
- 716 205. Eisenberg, D.S.; Sawaya, M.R. Structural Studies of Amyloid Proteins at the Molecular Level. *Annu Rev Biochem* **2017**, *86*,  
717 69-95, doi:10.1146/annurev-biochem-061516-045104.
- 718 206. Heerde, T.; Bansal, A.; Schmidt, M.; Fändrich, M. Cryo-EM structure of a catalytic amyloid fibril. *Sci Rep* **2023**, *13*, 4070,  
719 doi:10.1038/s41598-023-30711-y.
- 720 207. Heerde, T.; Schütz, D.; Lin, Y.J.; Münch, J.; Schmidt, M.; Fändrich, M. Cryo-EM structure and polymorphic maturation of a  
721 viral transduction enhancing amyloid fibril. *Nat Commun* **2023**, *14*, 4293, doi:10.1038/s41467-023-40042-1.
- 722 208. Gonay, V.; Dunne, M.P.; Caceres-Delpiano, J.; Kajava, A.V. Developing machine-learning-based amyloid predictors with  
723 Cross-Beta DB. *bioRxiv* **2024**, 2024.2002.2012.579644, doi:10.1101/2024.02.12.579644.
- 724 209. Bücker, R.; Seuring, C.; Cazey, C.; Veith, K.; Garcia-Alai, M.; Grünwald, K.; Landau, M. The Cryo-EM structures of two  
725 amphibian antimicrobial cross-beta amyloid fibrils. *Nat Commun* **2022**, *13*, 4356, doi:10.1038/s41467-022-32039-z.
- 726 210. Khurana, R.; Coleman, C.; Ionescu-Zanetti, C.; Carter, S.A.; Krishna, V.; Grover, R.K.; Roy, R.; Singh, S. Mechanism of  
727 thioflavin T binding to amyloid fibrils. *J Struct Biol* **2005**, *151*, 229-238, doi:10.1016/j.jsb.2005.06.006.
- 728 211. Have, A.; Sutter, M.; Jiskoot, W. Extrinsic fluorescent dyes as tools for protein characterization. *Pharm Res* **2008**, *25*,  
729 1487-1499, doi:10.1007/s11095-007-9516-9.
- 730 212. Amdursky, N.; Erez, Y.; Huppert, D. Molecular rotors: what lies behind the high sensitivity of the thioflavin-T fluorescent  
731 marker. *Acc Chem Res* **2012**, *45*, 1548-1557, doi:10.1021/ar300053p.
- 732 213. Biancalana, M.; Koide, S. Molecular mechanism of Thioflavin-T binding to amyloid fibrils. *Biochim Biophys Acta* **2010**, *1804*,  
733 1405-1412, doi:10.1016/j.bbapap.2010.04.001.
- 734 214. Gade Malmos, K.; Blancas-Mejia, L.M.; Weber, B.; Buchner, J.; Ramirez-Alvarado, M.; Naiki, H.; Otzen, D. ThT 101: a  
735 primer on the use of thioflavin T to investigate amyloid formation. *Amyloid* **2017**, *24*, 1-16,  
736 doi:10.1080/13506129.2017.1304905.
- 737 215. Lee, J.E.; Sang, J.C.; Rodrigues, M.; Carr, A.R.; Horrocks, M.H.; De, S.; Bongiovanni, M.N.; Flagmeier, P.; Dobson, C.M.;  
738 Wales, D.J.; et al. Mapping Surface Hydrophobicity of alpha-Synuclein Oligomers at the Nanoscale. *Nano Lett* **2018**, *18*,  
739 7494-7501, doi:10.1021/acs.nanolett.8b02916.
- 740 216. Taylor, C.G.; Meisl, G.; Horrocks, M.H.; Zetterberg, H.; Knowles, T.P.J.; Klenerman, D. Extrinsic Amyloid-Binding Dyes  
741 for Detection of Individual Protein Aggregates in Solution. *Anal Chem* **2018**, *90*, 10385-10393,  
742 doi:10.1021/acs.analchem.8b02226.

- 743 217. De, S.; Klenerman, D. Imaging individual protein aggregates to follow aggregation and determine the role of aggregates in  
744 neurodegenerative disease. *Biochim Biophys Acta Proteins Proteom* **2019**, *1867*, 870-878, doi:10.1016/j.bbapap.2018.12.010.
- 745 218. Sulatskaya, A.I.; Rychkov, G.N.; Sulatsky, M.I.; Mikhailova, E.V.; Melnikova, N.M.; Andozhskaya, V.S.; Kuznetsova, I.M.;  
746 Turoverov, K.K. New Evidence on a Distinction between A beta 40 and A beta 42 Amyloids: Thioflavin T Binding Modes,  
747 Clustering Tendency, Degradation Resistance, and Cross-Seeding. *Int J Mol Sci* **2022**, *23*, 5513.
- 748 219. Xue, C.; Lin, T.Y.; Chang, D.; Guo, Z. Thioflavin T as an amyloid dye: fibril quantification, optimal concentration and  
749 effect on aggregation. *R Soc Open Sci* **2017**, *4*, 160696, doi:10.1098/rsos.160696.
- 750 220. Arad, E.; Green, H.; Jelinek, R.; Rapaport, H. Revisiting thioflavin T (ThT) fluorescence as a marker of protein fibrillation -  
751 The prominent role of electrostatic interactions. *J Colloid Interface Sci* **2020**, *573*, 87-95, doi:10.1016/j.jcis.2020.03.075.
- 752 221. Lucignano, R.; Spadaccini, R.; Merlino, A.; Ami, D.; Natalello, A.; Ferraro, G.; Picone, D. Structural insights and  
753 aggregation propensity of a super-stable monellin mutant: A new potential building block for protein-based  
754 nanostructured materials. *Int J Biol Macromol* **2024**, *254*, 127775, doi:10.1016/j.ijbiomac.2023.127775.
- 755 222. Pujols, J.; Peña-Díaz, S.; Lázaro, D.F.; Peccati, F.; Pinheiro, F.; González, D.; Carija, A.; Navarro, S.; Conde-Giménez, M.;  
756 García, J.; et al. Small molecule inhibits alpha-synuclein aggregation, disrupts amyloid fibrils, and prevents degeneration  
757 of dopaminergic neurons. *Proc Natl Acad Sci U S A* **2018**, *115*, 10481-10486, doi:10.1073/pnas.1804198115.
- 758 223. Bertoncini, C.W.; Celej, M.S. Small molecule fluorescent probes for the detection of amyloid self-assembly *in vitro* and *in*  
759 *vivo*. *Curr Protein Pept Sci* **2011**, *12*, 205-220.
- 760 224. Panda, C.; Sharma, L.G.; Pandey, L.M. Experimental procedures to investigate fibrillation of proteins. *MethodsX* **2023**, *11*,  
761 102445, doi:10.1016/j.mex.2023.102445.
- 762 225. Choo, L.P.; Wetzel, D.L.; Halliday, W.C.; Jackson, M.; LeVine, S.M.; Mantsch, H.H. *In situ* characterization of beta-amyloid  
763 in Alzheimer's diseased tissue by synchrotron Fourier transform infrared microspectroscopy. *Biophys J* **1996**, *71*, 1672-1679,  
764 doi:10.1016/S0006-3495(96)79411-0.
- 765 226. Cerdà-Costa, N.; De la Arada, I.; Avilés, F.X.; Arrondo, J.L.; Villegas, S. Influence of aggregation propensity and stability  
766 on amyloid fibril formation as studied by Fourier transform infrared spectroscopy and two-dimensional COS analysis.  
767 *Biochemistry* **2009**, *48*, 10582-10590, doi:10.1021/bi900960s.
- 768 227. Prater, C.; Bai, Y.; Konings, S.C.; Martinsson, I.; Swaminathan, V.S.; Nordenfelt, P.; Gouras, G.; Borondics, F.; Klementieva,  
769 O. Fluorescently Guided Optical Photothermal Infrared Microspectroscopy for Protein-Specific Bioimaging at Subcellular  
770 Level. *J Med Chem* **2023**, *66*, 2542-2549, doi:10.1021/acs.jmedchem.2c01359.
- 771 228. Zhang, G.; Babenko, V.; Dzwolak, W.; Keiderling, T.A. Dimethyl Sulfoxide Induced Destabilization and Disassembly of  
772 Various Structural Variants of Insulin Fibrils Monitored by Vibrational Circular Dichroism. *Biochemistry* **2015**, *54*,  
773 7193-7202, doi:10.1021/acs.biochem.5b00809.
- 774 229. Cornejo, A.; Aguilar Sandoval, F.; Caballero, L.; Machuca, L.; Munoz, P.; Caballero, J.; Perry, G.; Ardiles, A.; Areche, C.;  
775 Melo, F. Rosmarinic acid prevents fibrillization and diminishes vibrational modes associated to beta sheet in tau protein  
776 linked to Alzheimer's disease. *J Enzyme Inhib Med Chem* **2017**, *32*, 945-953, doi:10.1080/14756366.2017.1347783.
- 777 230. Li, S.; Luo, Z.; Zhang, R.; Xu, H.; Zhou, T.; Liu, L.; Qu, J. Distinguishing Amyloid beta-Protein in a Mouse Model of  
778 Alzheimer's Disease by Label-Free Vibrational Imaging. *Biosensors (Basel)* **2021**, *11*, 365, doi:10.3390/bios11100365.
- 779 231. Watson, M.D.; Lee, J.C. Coupling chemical biology and vibrational spectroscopy for studies of amyloids *in vitro* and *in*  
780 *cells*. *Curr Opin Chem Biol* **2021**, *64*, 90-97, doi:10.1016/j.cbpa.2021.05.005.
- 781 232. Ami, D.; Natalello, A. Characterization of the Conformational Properties of Soluble and Insoluble Proteins by Fourier  
782 Transform Infrared Spectroscopy. *Methods Mol Biol* **2022**, *2406*, 439-454, doi:10.1007/978-1-0716-1859-2\_26.



- 783 233. Vu, K.H.P.; Blankenburg, G.H.; Lesser-Rojas, L.; Chou, C.F. Applications of Single-Molecule Vibrational Spectroscopic  
784 Techniques for the Structural Investigation of Amyloid Oligomers. *Molecules* **2022**, *27*, 6448,  
785 doi:10.3390/molecules27196448.
- 786 234. Ami, D.; Mereghetti, P.; Natalello, A. Contribution of Infrared Spectroscopy to the Understanding of Amyloid Protein  
787 Aggregation in Complex Systems. *Front Mol Biosci* **2022**, *9*, 822852, doi:10.3389/fmolb.2022.822852.
- 788 235. de la Arada, I.; Seiler, C.; Mantele, W. Amyloid fibril formation from human and bovine serum albumin followed by  
789 quasi-simultaneous Fourier-transform infrared (FT-IR) spectroscopy and static light scattering (SLS). *Eur Biophys J* **2012**, *41*,  
790 931-938, doi:10.1007/s00249-012-0845-1.
- 791 236. Ridgley, D.M.; Claunch, E.C.; Barone, J.R. Characterization of large amyloid fibers and tapes with Fourier transform  
792 infrared (FT-IR) and Raman spectroscopy. *Appl Spectrosc* **2013**, *67*, 1417-1426, doi:10.1366/13-07059.
- 793 237. Biancalana, M.; Makabe, K.; Koide, A.; Koide, S. Molecular mechanism of thioflavin-T binding to the surface of beta-rich  
794 peptide self-assemblies. *J Mol Biol* **2009**, *385*, 1052-1063, doi:10.1016/j.jmb.2008.11.006.
- 795 238. Sidhu, A.; Vaneyck, J.; Blum, C.; Segers-Nolten, I.; Subramaniam, V. Polymorph-specific distribution of binding sites  
796 determines thioflavin-T fluorescence intensity in alpha-synuclein fibrils. *Amyloid* **2018**, *25*, 189-196,  
797 doi:10.1080/13506129.2018.1517736.
- 798 239. Chisholm, T.S.; Hunter, C.A. A closer look at amyloid ligands, and what they tell us about protein aggregates. *Chem Soc*  
799 *Rev* **2024**, *53*, 1354-1374, doi:10.1039/d3cs00518f.
- 800 240. Rovnyagina, N.R.; Sluchanko, N.N.; Tikhonova, T.N.; Fadeev, V.V.; Litskevich, A.Y.; Maskevich, A.A.; Shirshin, E.A.  
801 Binding of thioflavin T by albumins: An underestimated role of protein oligomeric heterogeneity. *Int J Biol Macromol* **2018**,  
802 *108*, 284-290, doi:10.1016/j.ijbiomac.2017.12.002.
- 803 241. Rovnyagina, N.R.; Budylin, G.S.; Vainer, Y.G.; Tikhonova, T.N.; Vasin, S.L.; Yakovlev, A.A.; Kompanets, V.O.; Chekalin,  
804 S.V.; Priezhev, A.V.; Shirshin, E.A. Fluorescence Lifetime and Intensity of Thioflavin T as Reporters of Different  
805 Fibrillation Stages: Insights Obtained from Fluorescence Up-Conversion and Particle Size Distribution Measurements. *Int J*  
806 *Mol Sci* **2020**, *21*, 6169, doi:10.3390/ijms21176169.
- 807 242. Rovnyagina, N.R.; Tikhonova, T.N.; Kompanets, V.O.; Sluchanko, N.N.; Tugaeva, K.V.; Chekalin, S.V.; Fadeev, V.V.;  
808 Lademann, J.; Darvin, M.E.; Shirshi, E.A. Free and bound Thioflavin T molecules with ultrafast relaxation: implications for  
809 assessment of protein binding and aggregation. *Laser Phys Lett* **2019**, *16*, 075601,  
810 doi:<https://doi.org/10.1088/1612-202X/ab2244>.
- 811 243. Mikalauskaite, K.; Ziaunys, M.; Sneideris, T.; Smirnovas, V. Effect of Ionic Strength on Thioflavin-T Affinity to Amyloid  
812 Fibrils and Its Fluorescence Intensity. *Int J Mol Sci* **2020**, *21*, 8916, doi:10.3390/ijms21238916.
- 813 244. Ziaunys, M.; Sakalauskas, A.; Mikalauskaite, K.; Smirnovas, V. Exploring the occurrence of thioflavin-T-positive insulin  
814 amyloid aggregation intermediates. *PeerJ* **2021**, *9*, e10918, doi:10.7717/peerj.10918.
- 815 245. Wolfe, L.S.; Calabrese, M.F.; Nath, A.; Blaho, D.V.; Miranker, A.D.; Xiong, Y. Protein-induced photophysical changes to  
816 the amyloid indicator dye thioflavin T. *Proc Natl Acad Sci* **2010**, *107*, 16863-16868, doi:10.1073/pnas.1002867107.
- 817 246. Ziaunys, M.; Smirnovas, V. Additional Thioflavin-T Binding Mode in Insulin Fibril Inner Core Region. *J Phys Chem B* **2019**,  
818 *123*, 8727-8732, doi:10.1021/acs.jpcc.9b08652.
- 819 247. Ziaunys, M.; Mikalauskaite, K.; Sakalauskas, A.; Smirnovas, V. Investigating lysozyme amyloid fibril formation and  
820 structural variability dependence on its initial folding state under different pH conditions. *Protein Sci* **2024**, *33*, e4888,  
821 doi:10.1002/pro.4888.
- 822 248. Chaari, A.; Fahy, C.; Chevillot-Biraud, A.; Rholam, M. Investigating the effects of different natural molecules on the  
823 structure and oligomerization propensity of hen egg-white lysozyme. *Int J Biol Macromol* **2019**, *134*, 189-201,  
824 doi:10.1016/j.ijbiomac.2019.05.048.

- 825 249. Anselmo, S.; Sancataldo, G.; Vetri, V. Deciphering amyloid fibril molecular maturation through FLIM-phasor analysis of  
826 thioflavin T. *Biophys Rep (N Y)* **2024**, *4*, 100145, doi:10.1016/j.bpr.2024.100145.
- 827 250. Lindberg, D.J.; Wranne, M.S.; Gilbert Gatty, M.; Westerlund, F.; Esbjörner, E.K. Steady-state and time-resolved  
828 Thioflavin-T fluorescence can report on morphological differences in amyloid fibrils formed by Abeta(1-40) and  
829 Abeta(1-42). *Biochem Biophys Res Commun* **2015**, *458*, 418-423, doi:10.1016/j.bbrc.2015.01.132.
- 830 251. Sulatskaya, A.I.; Rodina, N.P.; Polyakov, D.S.; Sulatsky, M.I.; Artamonova, T.O.; Khodorkovskii, M.A.; Shavlovsky, M.M.;  
831 Kuznetsova, I.M.; Turoverov, K.K. Structural Features of Amyloid Fibrils Formed from the Full-Length and Truncated  
832 Forms of Beta-2-Microglobulin Probed by Fluorescent Dye Thioflavin T. *Int J Mol Sci* **2018**, *19*, 2762,  
833 doi:10.3390/ijms19092762.
- 834 252. De Luca, G.; Fennema Galparsoro, D.; Sancataldo, G.; Leone, M.; Fodera, V.; Vetri, V. Probing ensemble polymorphism  
835 and single aggregate structural heterogeneity in insulin amyloid self-assembly. *J Colloid Interface Sci* **2020**, *574*, 229-240,  
836 doi:10.1016/j.jcis.2020.03.107.
- 837 253. Thompson, A.J.; Herling, T.W.; Kubankova, M.; Vysniauskas, A.; Knowles, T.P.; Kuimova, M.K. Molecular Rotors Provide  
838 Insights into Microscopic Structural Changes During Protein Aggregation. *J Phys Chem B* **2015**, *119*, 10170-10179,  
839 doi:10.1021/acs.jpbc.5b05099.
- 840 254. Krebs, M.R.H.; Bromley, E.H.; Donald, A.M. The binding of thioflavin-T to amyloid fibrils: localisation and implications. *J*  
841 *Struct Biol* **2005**, *149*, 30-37, doi:10.1016/j.jsb.2004.08.002.
- 842 255. Noormägi, A.; Primar, K.; Tõugu, V.; Palumaa, P. Interference of low-molecular substances with the thioflavin-T  
843 fluorescence assay of amyloid fibrils. *J Pept Sci* **2012**, *18*, 59-64, doi:10.1002/psc.1416.
- 844 256. Hulscher, N.; Procter, B.C.; Wynn, C.; McCullough, P.A. Clinical Approach to Post-acute Sequelae After COVID-19  
845 Infection and Vaccination. *Cureus* **2023**, *15*, e49204, doi:10.7759/cureus.49204.
- 846 257. McCullough, P.A.; Wynn, C.; Procter, B.C. Clinical Rationale for SARS-CoV-2 Base Spike Protein Detoxification in Post  
847 COVID-19 and Vaccine Injury Syndromes *J Amer Phys Surg* **2023**, *28*, 90-93.
- 848 258. Yang, M.; Wu, J.; Huang, Q.; Jia, Y. Probing the Role of Catalytic Triad on the Cleavage between Intramolecular  
849 Chaperone and NK Mature Peptide. *J Agric Food Chem* **2021**, *69*, 2348-2353, doi:10.1021/acs.jafc.0c07238.
- 850 259. Pan, X.; Liang, P.; Teng, L.; Ren, Y.; Peng, J.; Liu, W.; Yang, Y. Study on molecular mechanisms of nattokinase in  
851 pharmacological action based on label-free liquid chromatography-tandem mass spectrometry. *Food Sci Nutr* **2019**, *7*,  
852 3185-3193, doi:10.1002/fsn3.1157.
- 853 260. Fujita, M.; Ito, Y.; Hong, K.; Nishimuro, S. Characterization of Nattokinase-degraded Products from Human Fibrinogen or  
854 Cross-linked Fibrin. *Fibrinolysis* **1995**, *9*, 157-164.
- 855 261. Tanikawa, T.; Kiba, Y.; Yu, J.; Hsu, K.; Chen, S.; Ishii, A.; Yokogawa, T.; Suzuki, R.; Inoue, Y.; Kitamura, M. Degradative  
856 Effect of Nattokinase on Spike Protein of SARS-CoV-2. *Molecules* **2022**, *27*, 5405.
- 857 262. Hsu, R.L.; Lee, K.T.; Wang, J.H.; Lee, L.Y.; Chen, R.P. Amyloid-degrading ability of nattokinase from *Bacillus subtilis* natto.  
858 *J Agric Food Chem* **2009**, *57*, 503-508, doi:10.1021/jf803072r.
- 859 263. Ni, A.; Li, H.; Wang, R.; Sun, R.; Zhang, Y. Degradation of amyloid  $\beta$ -peptides catalyzed by nattokinase *in vivo* and *in vitro*.  
860 *Food Sci Hum Wellness* **2023**, *12*, 1905-1916, doi: <http://doi.org/10.1016/j.fshw.2023.02.042>.
- 861 264. Naik, S.; Katariya, R.; Shelke, S.; Patravale, V.; Umekar, M.; Kotagale, N.; Taksande, B. Nattokinase prevents beta-amyloid  
862 peptide (A $\beta$ (1-42)) induced neuropsychiatric complications, neuroinflammation and BDNF signalling disruption in  
863 mice. *Eur J Pharmacol* **2023**, *952*, 175821, doi:10.1016/j.ejphar.2023.175821.
- 864 265. Meisl, G.; Knowles, T.P.; Klenerman, D. The molecular processes underpinning prion-like spreading and seed  
865 amplification in protein aggregation. *Curr Opin Neurobiol* **2020**, *61*, 58-64, doi:10.1016/j.conb.2020.01.010.

- 866 266. Young, K.A.; Mancera, R.L. Review: Investigating the aggregation of amyloid beta with surface plasmon resonance: Do  
867 different approaches yield different results? *Anal Biochem* **2022**, *654*, 114828, doi:10.1016/j.ab.2022.114828.
- 868 267. Jan, A.; Gokce, O.; Luthi-Carter, R.; Lashuel, H.A. The ratio of monomeric to aggregated forms of Abeta40 and Abeta42 is  
869 an important determinant of amyloid-beta aggregation, fibrillogenesis, and toxicity. *J Biol Chem* **2008**, *283*, 28176-28189,  
870 doi:10.1074/jbc.M803159200.
- 871 268. Wang, L.; Eom, K.; Kwon, T. Different Aggregation Pathways and Structures for Abeta40 and Abeta42 Peptides.  
872 *Biomolecules* **2021**, *11*, 198, doi:10.3390/biom11020198.
- 873 269. Wei, G.; Su, Z.; Reynolds, N.P.; Arosio, P.; Hamley, I.W.; Gazit, E.; Mezzenga, R. Self-assembling peptide and protein  
874 amyloids: from structure to tailored function in nanotechnology. *Chem Soc Rev* **2017**, *46*, 4661-4708, doi:10.1039/c6cs00542j.
- 875 270. Tipping, K.W.; van Oosten-Hawle, P.; Hewitt, E.W.; Radford, S.E. Amyloid Fibres: Inert End-Stage Aggregates or Key  
876 Players in Disease? *Trends Biochem Sci* **2015**, *40*, 719-727, doi:10.1016/j.tibs.2015.10.002.
- 877 271. Tycko, R. Structure of aggregates revealed. *Nature* **2016**, *537*, 492-493, doi:10.1038/nature19470.
- 878 272. Bunce, S.J.; Wang, Y.; Stewart, K.L.; Ashcroft, A.E.; Radford, S.E.; Hall, C.K.; Wilson, A.J. Molecular insights into the  
879 surface-catalyzed secondary nucleation of amyloid-beta(40) (Abeta(40)) by the peptide fragment Abeta(16-22). *Sci Adv*  
880 **2019**, *5*, eaav8216, doi:10.1126/sciadv.aav8216.
- 881 273. Michaels, T.C.T.; Saric, A.; Habchi, J.; Chia, S.; Meisl, G.; Vendruscolo, M.; Dobson, C.M.; Knowles, T.P.J. Chemical  
882 Kinetics for Bridging Molecular Mechanisms and Macroscopic Measurements of Amyloid Fibril Formation. *Annu Rev Phys*  
883 *Chem* **2018**, *69*, 273-298, doi:10.1146/annurev-physchem-050317-021322.
- 884 274. Vaquer-Alicea, J.; Diamond, M.I. Propagation of Protein Aggregation in Neurodegenerative Diseases. *Annu Rev Biochem*  
885 **2019**, *88*, 785-810, doi:10.1146/annurev-biochem-061516-045049.
- 886 275. Ke, P.C.; Zhou, R.; Serpell, L.C.; Riek, R.; Knowles, T.P.J.; Lashuel, H.A.; Gazit, E.; Hamley, I.W.; Davis, T.P.; Fandrich, M.;  
887 et al. Half a century of amyloids: past, present and future. *Chem Soc Rev* **2020**, *49*, 5473-5509, doi:10.1039/c9cs00199a.
- 888 276. Hammarström, P.; Simon, R.; Nyström, S.; Konradsson, P.; Åslund, A.; Nilsson, K.P.R. A fluorescent pentameric  
889 thiophene derivative detects in vitro-formed prefibrillar protein aggregates. *Biochemistry* **2010**, *49*, 6838-6845,  
890 doi:10.1021/bi100922r.
- 891 277. Klingstedt, T.; Nilsson, K.P.R. Luminescent conjugated poly- and oligo-thiophenes: optical ligands for spectral assignment  
892 of a plethora of protein aggregates. *Biochem Soc Trans* **2012**, *40*, 704-710, doi:10.1042/BST20120009.
- 893 278. König, C.; Skånberg, R.; Hotz, I.; Ynnerman, A.; Norman, P.; Linares, M. Binding sites for luminescent amyloid biomarkers  
894 from non-biased molecular dynamics simulations. *Chem Commun* **2018**, *54*, 3030-3033, doi:10.1039/c8cc00105g.
- 895 279. Nilsson, K.P.; Lindgren, M.; Hammarström, P. A pentameric luminescent-conjugated oligothiophene for optical imaging  
896 of in vitro-formed amyloid fibrils and protein aggregates in tissue sections. *Methods Mol Biol* **2012**, *849*, 425-434,  
897 doi:10.1007/978-1-61779-551-0\_29.
- 898 280. Nyström, S.; Bäck, M.; Nilsson, K.P.R.; Hammarström, P. Imaging Amyloid Tissues Stained with Luminescent Conjugated  
899 Oligothiophenes by Hyperspectral Confocal Microscopy and Fluorescence Lifetime Imaging. *J Vis Exp* **2017**, 56279,  
900 doi:10.3791/56279.
- 901 281. Sjölander, D.; Bijzet, J.; Hazenberg, B.P.C.; Nilsson, K.P.; Hammarström, P. Sensitive and rapid assessment of amyloid by  
902 oligothiophene fluorescence in subcutaneous fat tissue. *Amyloid* **2015**, *22*, 19-25, doi:10.3109/13506129.2014.984063.
- 903 282. Petrlova, J.; Samsudin, F.; Bond, P.J.; Schmidtchen, A. SARS-CoV-2 spike protein aggregation is triggered by bacterial  
904 lipopolysaccharide. *FEBS Lett* **2022**, *596*, 2566-2575, doi:10.1002/1873-3468.14490.
- 905 283. Morten, M.J.; Sirvio, L.; Rupawala, H.; Mee Hayes, E.; Franco, A.; Radulescu, C.; Ying, L.; Barnes, S.J.; Muga, A.; Ye, Y.  
906 Quantitative super-resolution imaging of pathological aggregates reveals distinct toxicity profiles in different  
907 synucleinopathies. *Proc Natl Acad Sci U S A* **2022**, *119*, e2205591119, doi:10.1073/pnas.2205591119.

- 908 284. Currin, A.; Swainston, N.; Day, P.J.; Kell, D.B. Synthetic biology for the directed evolution of protein biocatalysts:  
909 navigating sequence space intelligently. *Chem Soc Rev* **2015**, *44*, 1172-1239, doi:10.1039/c1034cs00351a.
- 910 285. Metkar, S.K.; Girigoswami, A.; Murugesan, R.; Girigoswami, K. Lumbrokinase for degradation and reduction of amyloid  
911 fibrils associated with amyloidosis. *Journal of Applied Biomedicine* **2017**, *15*, 96-104.
- 912 286. Metkar, S.K.; Ghosh, S.; Girigoswami, A.; Girigoswami, K. The Potential of Serratiopeptidase and Lumbrokinase for the  
913 Degradation of Prion Peptide 106-126 - an In Vitro and In Silico Perspective. *CNS Neurol Disord Drug Targets* **2019**, *18*,  
914 723-731, doi:10.2174/1871527318666191021150002.
- 915 287. Metkar, S.K.; Girigoswami, A.; Vijayashree, R.; Girigoswami, K. Attenuation of subcutaneous insulin induced amyloid  
916 mass in vivo using Lumbrokinase and Serratiopeptidase. *Int J Biol Macromol* **2020**, *163*, 128-134,  
917 doi:10.1016/j.ijbiomac.2020.06.256.
- 918 288. Fadl, N.N.; Ahmed, H.H.; Booles, H.F.; Sayed, A.H. Serrapeptase and nattokinase intervention for relieving Alzheimer's  
919 disease pathophysiology in rat model. *Hum Exp Toxicol* **2013**, *32*, 721-735, doi:10.1177/0960327112467040.
- 920 289. Jadhav, S.B.; Shah, N.; Rathi, A.; Rathi, V.; Rathi, A. Serratiopeptidase: Insights into the therapeutic applications. *Biotechnol*  
921 *Rep (Amst)* **2020**, *28*, e00544, doi:10.1016/j.btre.2020.e00544.
- 922 290. Metkar, S.K.; Girigoswami, A.; Bondage, D.D.; Shinde, U.G.; Girigoswami, K. The potential of lumbrokinase and  
923 serratiopeptidase for the degradation of A $\beta$  1-42 peptide – an in vitro and in silico approach. *Int J Neurosci* **2024**, *134*,  
924 112-123, doi:<https://doi.org/10.1080/00207454.2022.2089137>.
- 925 291. Liao, J.; Ren, X.; Yang, B.; Li, H.; Zhang, Y.; Yin, Z. Targeted thrombolysis by using c-RGD-modified N,N,N-Trimethyl  
926 Chitosan nanoparticles loaded with lumbrokinase. *Drug Dev Ind Pharm* **2019**, *45*, 88-95, doi:10.1080/03639045.2018.1522324.
- 927 292. Metkar, S.K.; Girigoswami, A.; Murugesan, R.; Girigoswami, K. *In vitro* and *in vivo* insulin amyloid degradation mediated  
928 by Serratiopeptidase. *Mater Sci Eng C Mater Biol Appl* **2017**, *70*, 728-735, doi:10.1016/j.msec.2016.09.049.
- 929 293. Nair, S.R.; C, S.D. Serratiopeptidase: An integrated View of Multifaceted Therapeutic Enzyme. *Biomolecules* **2022**, *12*, 1468,  
930 doi:10.3390/biom12101468.
- 931 294. Katsipis, G.; Avgoulas, D.I.; Geromichalos, G.D.; Petala, M.; Pantazaki, A.A. In vitro and in silico evaluation of the  
932 serrapeptase effect on biofilm and amyloids of *Pseudomonas aeruginosa*. *Appl Microbiol Biotechnol* **2023**, *107*, 7269-7285,  
933 doi:10.1007/s00253-023-12772-1.
- 934 295. Mei, J.f.; Cai, S.f.; Yi, Y.; Wang, X.D.; Ying, G.Q. Study of the fibrinolytic activity of serrapeptase and its *in vitro*  
935 thrombolytic effects. *Braz J Pharm Sci* **2022**, *58*, e201004, doi:<https://doi.org/10.1590/s2175-97902022e201004>.
- 936 296. Banerjee, G.; Ray, A.K. Impact of microbial proteases on biotechnological industries. *Biotechnol Genet Eng Rev* **2017**, *33*,  
937 119-143, doi:10.1080/02648725.2017.1408256.
- 938 297. Ladner-Keay, C.L.; Griffith, B.J.; Wishart, D.S. Shaking alone induces *de novo* conversion of recombinant prion proteins to  
939 beta-sheet rich oligomers and fibrils. *PLoS One* **2014**, *9*, e98753, doi:10.1371/journal.pone.0098753.
- 940 298. Krzek, M.; Stroobants, S.; Gelin, P.; De Malsche, W.; Maes, D. Influence of Centrifugation and Shaking on the  
941 Self-Assembly of Lysozyme Fibrils. *Biomolecules* **2022**, *12*, 1746, doi:10.3390/biom12121746.
- 942 299. Hill, E.K.; Krebs, B.; Goodall, D.G.; Howlett, G.J.; Dunstan, D.E. Shear flow induces amyloid fibril formation.  
943 *Biomacromolecules* **2006**, *7*, 10-13, doi:10.1021/bm0505078.
- 944 300. Dunstan, D.E.; Hamilton-Brown, P.; Asimakis, P.; Ducker, W.; Bertolini, J. Shear flow promotes amyloid-beta fibrilization.  
945 *Protein Eng Des Sel* **2009**, *22*, 741-746, doi:10.1093/protein/gzp059.
- 946 301. Chaari, A.; Fahy, C.; Chevillot-Biraud, A.; Rholam, M. Insights into Kinetics of Agitation-Induced Aggregation of Hen  
947 Lysozyme under Heat and Acidic Conditions from Various Spectroscopic Methods. *PLoS One* **2015**, *10*, e0142095,  
948 doi:10.1371/journal.pone.0142095.

- 949 302. Teoh, C.L.; Bekard, I.B.; Asimakis, P.; Griffin, M.D.; Ryan, T.M.; Dunstan, D.E.; Howlett, G.J. Shear flow induced changes  
950 in apolipoprotein C-II conformation and amyloid fibril formation. *Biochemistry* **2011**, *50*, 4046-4057, doi:10.1021/bi2002482.
- 951 303. Dunstan, I.B.B.a.D.E. The Effect of Shear Flow on Amyloid Fibril Formation and Morphology. In *Bio-nanoimaging: Protein*  
952 *Misfolding & Aggregation*, Uversky, V.N., Lyubchenko, Y.L., Eds.; Elsevier: Amsterdam, 2014; pp. 503-513.
- 953 304. Gospodarczyk, W.; Kozak, M. The severe impact of *in vivo*-like microfluidic flow and the influence of gemini surfactants  
954 on amyloid aggregation of hen egg white lysozyme. *RSC Adv* **2017**, *7*, 10973, doi:10.1039/c6ra26675d.
- 955 305. Mangione, P.P.; Esposito, G.; Relini, A.; Raimondi, S.; Porcari, R.; Giorgetti, S.; Corazza, A.; Fogolari, F.; Penco, A.; Goto, Y.;  
956 et al. Structure, folding dynamics, and amyloidogenesis of D76N beta2-microglobulin: roles of shear flow, hydrophobic  
957 surfaces, and alpha-crystallin. *J Biol Chem* **2013**, *288*, 30917-30930, doi:10.1074/jbc.M113.498857.
- 958 306. Dobson, J.; Kumar, A.; Willis, L.F.; Tuma, R.; Higazi, D.R.; Turner, R.; Lowe, D.C.; Ashcroft, A.E.; Radford, S.E.; Kapur, N.;  
959 et al. Inducing protein aggregation by extensional flow. *Proc Natl Acad Sci U S A* **2017**, *114*, 4673-4678,  
960 doi:10.1073/pnas.1702724114.
- 961 307. Herrera-Rodríguez, A.M.; Dasanna, A.K.; Daday, C.; Cruz-Chú, E.R.; Aponte-Santamaría, C.; Schwarz, U.S.; Gräter, F. The  
962 role of flow in the self-assembly of dragline spider silk proteins. *Biophys J* **2023**, *122*, 4241-4253,  
963 doi:10.1016/j.bpj.2023.09.020.
- 964 308. Almohammadi, H.; Bagnani, M.; Mezzenga, R. Flow-induced order-order transitions in amyloid fibril liquid crystalline  
965 tactoids. *Nat Commun* **2020**, *11*, 5416, doi:10.1038/s41467-020-19213-x.
- 966 309. Majka, Z.; Kwiecien, K.; Kaczor, A. Vibrational Optical Activity of amyloid fibrils. *Chempluschem* **2024**, e202400091,  
967 doi:10.1002/cplu.202400091.
- 968 310. Kleiner-Grote, G.R.M.; Risse, J.M.; Friehs, K. Secretion of recombinant proteins from *E. coli*. *Eng Life Sci* **2018**, *18*, 532-550,  
969 doi:10.1002/elsc.201700200.
- 970 311. Inoue, H.; Nojima, H.; Okayama, H. High efficiency transformation of *Escherichia coli* with plasmids. *Gene* **1990**, *96*, 23-28,  
971 doi:10.1016/0378-1119(90)90336-p.
- 972 312. Schimek, C.; Egger, E.; Tauer, C.; Striedner, G.; Brocard, C.; Cserjan-Puschmann, M.; Hahn, R. Extraction of recombinant  
973 periplasmic proteins under industrially relevant process conditions: Selectivity and yield strongly depend on protein titer  
974 and methodology. *Biotechnol Prog* **2020**, *36*, e2999, doi:10.1002/btpr.2999.
- 975 313. Mital, S.; Christie, G.; Dikicioglu, D. Recombinant expression of insoluble enzymes in *Escherichia coli*: a systematic review  
976 of experimental design and its manufacturing implications. *Microb Cell Fact* **2021**, *20*, 208, doi:10.1186/s12934-021-01698-w.
